# Supplementary material for: Mitochondrial disease patient motivations and barriers to participate in clinical trials
Source: PubMed Central journal article supplement (PMC5957366; doi:10.1371/journal.pone.0197513), 2018-05-17
Supplement: pone.0197513.s001.pdf [file pone.0197513.s001.pdf]

*Confidential*

Page 2 of 24

---

---

**PARTICIPANT**

For whom are you completing this survey?

- Yourself  
 Your child

---



---

**DEMOGRAPHICS**

What is your child's biological sex?

- Male  
 Female

What is your child's age?

\_\_\_\_\_

Does your child have a mitochondrial disease?

- Yes  
 No

Does your child have a known genetic mutation that is clearly the cause of their mitochondrial disease?

- Yes  
 No  
 Don't know

Does your child's disease-causing mutation involve the nuclear DNA (nDNA) or mitochondrial DNA (mtDNA)?

- Nuclear DNA  
 Mitochondrial DNA  
 Don't know

What is your biological sex?

- Male  
 Female

What is your age?

\_\_\_\_\_

Do you have a mitochondrial disease?

- Yes  
 No

Do you have a known genetic mutation that is clearly the cause of your mitochondrial disease?

- Yes  
 No  
 Don't know

Is the disease-causing mutation involving the nuclear DNA (nDNA) or mitochondrial DNA (mtDNA)?

- Nuclear DNA  
 Mitochondrial DNA  
 Don't know

What is the highest level of school you have completed or the highest degree you have received?

- Less than high school degree  
 High school degree or equivalent (e.g., GED)  
 Some college but no degree  
 Associate degree  
 Bachelor degree  
 Graduate degree

What is your zip code?

\_\_\_\_\_

Do you have a mitochondrial disease?

- Yes  
 No

If you have children, do any of your children have a mitochondrial disease?

- Yes  
 No  
 Not applicable

*Confidential*

Page 4 of 24

---

---

**FAMILY HISTORY**

Please list all other family members with mitochondrial disease (e.g. parents, siblings, cousins). Type "none" if there is no additional family history of mitochondrial disease.

---

*Confidential*

Page 5 of 24

---

---

**PREVIOUS EXPERIENCE**

Have you/your child ever participated in a previous research study?

Yes  
 No

Have you/your child ever participated in a clinical trial?

Yes  
 No

Do you know anyone that has participated in a clinical trial?

Yes  
 No

---



---

**CURRENT SYMPTOMS**

**For questions that ask about you/your child, please respond based on who you are filling this survey out for (either for yourself or for your child).**

**Rate the severity of each of the following symptoms for you/your child.**

|                                       | None or never            | Mild                     | Moderate                 | Severe                   | Very severe              |
|---------------------------------------|--------------------------|--------------------------|--------------------------|--------------------------|--------------------------|
| Chronic fatigue                       | <input type="checkbox"/> | <input type="checkbox"/> | <input type="checkbox"/> | <input type="checkbox"/> | <input type="checkbox"/> |
| Exercise intolerance                  | <input type="checkbox"/> | <input type="checkbox"/> | <input type="checkbox"/> | <input type="checkbox"/> | <input type="checkbox"/> |
| Muscle weakness                       | <input type="checkbox"/> | <input type="checkbox"/> | <input type="checkbox"/> | <input type="checkbox"/> | <input type="checkbox"/> |
| Developmental delay                   | <input type="checkbox"/> | <input type="checkbox"/> | <input type="checkbox"/> | <input type="checkbox"/> | <input type="checkbox"/> |
| Epilepsy or seizures                  | <input type="checkbox"/> | <input type="checkbox"/> | <input type="checkbox"/> | <input type="checkbox"/> | <input type="checkbox"/> |
| Stroke                                | <input type="checkbox"/> | <input type="checkbox"/> | <input type="checkbox"/> | <input type="checkbox"/> | <input type="checkbox"/> |
| Speech problem                        | <input type="checkbox"/> | <input type="checkbox"/> | <input type="checkbox"/> | <input type="checkbox"/> | <input type="checkbox"/> |
| Behavioral problems                   | <input type="checkbox"/> | <input type="checkbox"/> | <input type="checkbox"/> | <input type="checkbox"/> | <input type="checkbox"/> |
| Mood disorder                         | <input type="checkbox"/> | <input type="checkbox"/> | <input type="checkbox"/> | <input type="checkbox"/> | <input type="checkbox"/> |
| Headache                              | <input type="checkbox"/> | <input type="checkbox"/> | <input type="checkbox"/> | <input type="checkbox"/> | <input type="checkbox"/> |
| Intellectual disability               | <input type="checkbox"/> | <input type="checkbox"/> | <input type="checkbox"/> | <input type="checkbox"/> | <input type="checkbox"/> |
| Learning disability                   | <input type="checkbox"/> | <input type="checkbox"/> | <input type="checkbox"/> | <input type="checkbox"/> | <input type="checkbox"/> |
| Autism-spectrum behaviors             | <input type="checkbox"/> | <input type="checkbox"/> | <input type="checkbox"/> | <input type="checkbox"/> | <input type="checkbox"/> |
| Dehydration                           | <input type="checkbox"/> | <input type="checkbox"/> | <input type="checkbox"/> | <input type="checkbox"/> | <input type="checkbox"/> |
| Liver disease                         | <input type="checkbox"/> | <input type="checkbox"/> | <input type="checkbox"/> | <input type="checkbox"/> | <input type="checkbox"/> |
| Kidney disease                        | <input type="checkbox"/> | <input type="checkbox"/> | <input type="checkbox"/> | <input type="checkbox"/> | <input type="checkbox"/> |
| Diabetes                              | <input type="checkbox"/> | <input type="checkbox"/> | <input type="checkbox"/> | <input type="checkbox"/> | <input type="checkbox"/> |
| High cholesterol and/or triglycerides | <input type="checkbox"/> | <input type="checkbox"/> | <input type="checkbox"/> | <input type="checkbox"/> | <input type="checkbox"/> |
| Dysautonomia                          | <input type="checkbox"/> | <input type="checkbox"/> | <input type="checkbox"/> | <input type="checkbox"/> | <input type="checkbox"/> |
| Hearing loss                          | <input type="checkbox"/> | <input type="checkbox"/> | <input type="checkbox"/> | <input type="checkbox"/> | <input type="checkbox"/> |
| Tinnitus (ringing in ears)            | <input type="checkbox"/> | <input type="checkbox"/> | <input type="checkbox"/> | <input type="checkbox"/> | <input type="checkbox"/> |
| Decreased vision                      | <input type="checkbox"/> | <input type="checkbox"/> | <input type="checkbox"/> | <input type="checkbox"/> | <input type="checkbox"/> |
| Retinal problems                      | <input type="checkbox"/> | <input type="checkbox"/> | <input type="checkbox"/> | <input type="checkbox"/> | <input type="checkbox"/> |
| Optic nerve problems                  | <input type="checkbox"/> | <input type="checkbox"/> | <input type="checkbox"/> | <input type="checkbox"/> | <input type="checkbox"/> |
| Eye muscle problems                   | <input type="checkbox"/> | <input type="checkbox"/> | <input type="checkbox"/> | <input type="checkbox"/> | <input type="checkbox"/> |
| Ptosis (drooping eyelids)             | <input type="checkbox"/> | <input type="checkbox"/> | <input type="checkbox"/> | <input type="checkbox"/> | <input type="checkbox"/> |
| Balance problems                      | <input type="checkbox"/> | <input type="checkbox"/> | <input type="checkbox"/> | <input type="checkbox"/> | <input type="checkbox"/> |
| Peripheral neuropathy                 | <input type="checkbox"/> | <input type="checkbox"/> | <input type="checkbox"/> | <input type="checkbox"/> | <input type="checkbox"/> |
| Gastrointestinal problems             | <input type="checkbox"/> | <input type="checkbox"/> | <input type="checkbox"/> | <input type="checkbox"/> | <input type="checkbox"/> |
| Difficulty falling or staying asleep  | <input type="checkbox"/> | <input type="checkbox"/> | <input type="checkbox"/> | <input type="checkbox"/> | <input type="checkbox"/> |
| Sleep apnea                           | <input type="checkbox"/> | <input type="checkbox"/> | <input type="checkbox"/> | <input type="checkbox"/> | <input type="checkbox"/> |

Confidential

Page 7 of 24

|                           |                          |                          |                          |                          |                          |
|---------------------------|--------------------------|--------------------------|--------------------------|--------------------------|--------------------------|
| Heart muscle problems     | <input type="checkbox"/> | <input type="checkbox"/> | <input type="checkbox"/> | <input type="checkbox"/> | <input type="checkbox"/> |
| Heart rhythm problems     | <input type="checkbox"/> | <input type="checkbox"/> | <input type="checkbox"/> | <input type="checkbox"/> | <input type="checkbox"/> |
| Difficulty gaining weight | <input type="checkbox"/> | <input type="checkbox"/> | <input type="checkbox"/> | <input type="checkbox"/> | <input type="checkbox"/> |
| Difficulty losing weight  | <input type="checkbox"/> | <input type="checkbox"/> | <input type="checkbox"/> | <input type="checkbox"/> | <input type="checkbox"/> |

Other symptoms (please specify) \_\_\_\_\_

---



---

**DRUG THERAPY**

Please rate how each item would affect your decisions to participate or not participate in a clinical trial.

For questions that ask about you/your child, please respond based on who you are filling this survey out for (either for yourself or for your child).

How likely would you/your child be to participate in a clinical trial if it involves...

|                                                                                        | Would not Participate    | Unlikely to Participate  | Unsure                   | Likely to Participate    | Would Participate        |
|----------------------------------------------------------------------------------------|--------------------------|--------------------------|--------------------------|--------------------------|--------------------------|
| Taking a new drug that has never been used before on people                            | <input type="checkbox"/> | <input type="checkbox"/> | <input type="checkbox"/> | <input type="checkbox"/> | <input type="checkbox"/> |
| Taking a drug that has been used for other purposes, but not for mitochondrial disease | <input type="checkbox"/> | <input type="checkbox"/> | <input type="checkbox"/> | <input type="checkbox"/> | <input type="checkbox"/> |
| Taking a vitamin                                                                       | <input type="checkbox"/> | <input type="checkbox"/> | <input type="checkbox"/> | <input type="checkbox"/> | <input type="checkbox"/> |
| Taking an antioxidant                                                                  | <input type="checkbox"/> | <input type="checkbox"/> | <input type="checkbox"/> | <input type="checkbox"/> | <input type="checkbox"/> |
| Taking a natural supplement that is available at health food stores (ie. GNC)          | <input type="checkbox"/> | <input type="checkbox"/> | <input type="checkbox"/> | <input type="checkbox"/> | <input type="checkbox"/> |
| Taking a plant-derived product                                                         | <input type="checkbox"/> | <input type="checkbox"/> | <input type="checkbox"/> | <input type="checkbox"/> | <input type="checkbox"/> |
| Taking a food product                                                                  | <input type="checkbox"/> | <input type="checkbox"/> | <input type="checkbox"/> | <input type="checkbox"/> | <input type="checkbox"/> |
| Participating in an exercise test                                                      | <input type="checkbox"/> | <input type="checkbox"/> | <input type="checkbox"/> | <input type="checkbox"/> | <input type="checkbox"/> |
| Making no changes to your current medications                                          | <input type="checkbox"/> | <input type="checkbox"/> | <input type="checkbox"/> | <input type="checkbox"/> | <input type="checkbox"/> |
| Stopping one of your current medications                                               | <input type="checkbox"/> | <input type="checkbox"/> | <input type="checkbox"/> | <input type="checkbox"/> | <input type="checkbox"/> |
| Stopping all of your current medications                                               | <input type="checkbox"/> | <input type="checkbox"/> | <input type="checkbox"/> | <input type="checkbox"/> | <input type="checkbox"/> |
| Changing your diet                                                                     | <input type="checkbox"/> | <input type="checkbox"/> | <input type="checkbox"/> | <input type="checkbox"/> | <input type="checkbox"/> |

---



---

**DRUG THERAPY**

Please rate how each item would affect your decisions to participate or not participate in a clinical trial.

For questions that ask about you/your child, please respond based on who you are filling this survey out for (either for yourself or for your child).

How likely would you/your child be to participate in a clinical trial if the drug...

|                                          | Would not Participate    | Unlikely to Participate  | Unsure                   | Likely to Participate    | Would Participate        |
|------------------------------------------|--------------------------|--------------------------|--------------------------|--------------------------|--------------------------|
| Is a pill                                | <input type="checkbox"/> | <input type="checkbox"/> | <input type="checkbox"/> | <input type="checkbox"/> | <input type="checkbox"/> |
| Is an injection                          | <input type="checkbox"/> | <input type="checkbox"/> | <input type="checkbox"/> | <input type="checkbox"/> | <input type="checkbox"/> |
| Has to be taken one time a day           | <input type="checkbox"/> | <input type="checkbox"/> | <input type="checkbox"/> | <input type="checkbox"/> | <input type="checkbox"/> |
| Has to be taken two times a day          | <input type="checkbox"/> | <input type="checkbox"/> | <input type="checkbox"/> | <input type="checkbox"/> | <input type="checkbox"/> |
| Has to be taken three times a day        | <input type="checkbox"/> | <input type="checkbox"/> | <input type="checkbox"/> | <input type="checkbox"/> | <input type="checkbox"/> |
| Has to be taken four or more times a day | <input type="checkbox"/> | <input type="checkbox"/> | <input type="checkbox"/> | <input type="checkbox"/> | <input type="checkbox"/> |
| Can be self administered                 | <input type="checkbox"/> | <input type="checkbox"/> | <input type="checkbox"/> | <input type="checkbox"/> | <input type="checkbox"/> |
| Has to be given by a nurse               | <input type="checkbox"/> | <input type="checkbox"/> | <input type="checkbox"/> | <input type="checkbox"/> | <input type="checkbox"/> |
| Has to be given at the hospital          | <input type="checkbox"/> | <input type="checkbox"/> | <input type="checkbox"/> | <input type="checkbox"/> | <input type="checkbox"/> |



---



---

**DRUG THERAPY**

Please rate how each item would affect your decisions to participate or not participate in a clinical trial.

For questions that ask about you/your child, please respond based on who you are filling this survey out for (either for yourself or for your child).

**If you/your child were enrolled in a clinical trial...**

|                                                                                                       | Quit the clinical trial  | Stay in the clinical trial |
|-------------------------------------------------------------------------------------------------------|--------------------------|----------------------------|
| And the same drug became widely available to all people, would you...                                 | <input type="checkbox"/> | <input type="checkbox"/>   |
| And a comparable drug became widely available to all people, would you...                             | <input type="checkbox"/> | <input type="checkbox"/>   |
| And a promising new but completely unrelated drug became widely available to all people, would you... | <input type="checkbox"/> | <input type="checkbox"/>   |
| And you had progression of your disease symptoms while enrolled, would you...                         | <input type="checkbox"/> | <input type="checkbox"/>   |

---



---

**GOAL OF THE STUDY**

Please rate how each item would affect your decisions to participate or not participate in a clinical trial.

For questions that ask about you/your child, please respond based on who you are filling this survey out for (either for yourself or for your child).

How likely would you/your child be to participate in a clinical trial if it is supposed to help with the following ...

|                                       | Would not Participate    | Unlikely to Participate  | Unsure                   | Likely to Participate    | Would Participate        |
|---------------------------------------|--------------------------|--------------------------|--------------------------|--------------------------|--------------------------|
| Chronic fatigue                       | <input type="checkbox"/> | <input type="checkbox"/> | <input type="checkbox"/> | <input type="checkbox"/> | <input type="checkbox"/> |
| Exercise intolerance                  | <input type="checkbox"/> | <input type="checkbox"/> | <input type="checkbox"/> | <input type="checkbox"/> | <input type="checkbox"/> |
| Muscle weakness                       | <input type="checkbox"/> | <input type="checkbox"/> | <input type="checkbox"/> | <input type="checkbox"/> | <input type="checkbox"/> |
| Developmental delay                   | <input type="checkbox"/> | <input type="checkbox"/> | <input type="checkbox"/> | <input type="checkbox"/> | <input type="checkbox"/> |
| Epilepsy or seizures                  | <input type="checkbox"/> | <input type="checkbox"/> | <input type="checkbox"/> | <input type="checkbox"/> | <input type="checkbox"/> |
| Stroke                                | <input type="checkbox"/> | <input type="checkbox"/> | <input type="checkbox"/> | <input type="checkbox"/> | <input type="checkbox"/> |
| Speech problem                        | <input type="checkbox"/> | <input type="checkbox"/> | <input type="checkbox"/> | <input type="checkbox"/> | <input type="checkbox"/> |
| Behavioral problems                   | <input type="checkbox"/> | <input type="checkbox"/> | <input type="checkbox"/> | <input type="checkbox"/> | <input type="checkbox"/> |
| Mood disorder                         | <input type="checkbox"/> | <input type="checkbox"/> | <input type="checkbox"/> | <input type="checkbox"/> | <input type="checkbox"/> |
| Headache                              | <input type="checkbox"/> | <input type="checkbox"/> | <input type="checkbox"/> | <input type="checkbox"/> | <input type="checkbox"/> |
| Intellectual disability               | <input type="checkbox"/> | <input type="checkbox"/> | <input type="checkbox"/> | <input type="checkbox"/> | <input type="checkbox"/> |
| Learning disability                   | <input type="checkbox"/> | <input type="checkbox"/> | <input type="checkbox"/> | <input type="checkbox"/> | <input type="checkbox"/> |
| Autism-spectrum behaviors             | <input type="checkbox"/> | <input type="checkbox"/> | <input type="checkbox"/> | <input type="checkbox"/> | <input type="checkbox"/> |
| Dehydration                           | <input type="checkbox"/> | <input type="checkbox"/> | <input type="checkbox"/> | <input type="checkbox"/> | <input type="checkbox"/> |
| Liver disease                         | <input type="checkbox"/> | <input type="checkbox"/> | <input type="checkbox"/> | <input type="checkbox"/> | <input type="checkbox"/> |
| Kidney disease                        | <input type="checkbox"/> | <input type="checkbox"/> | <input type="checkbox"/> | <input type="checkbox"/> | <input type="checkbox"/> |
| Diabetes                              | <input type="checkbox"/> | <input type="checkbox"/> | <input type="checkbox"/> | <input type="checkbox"/> | <input type="checkbox"/> |
| High cholesterol and/or triglycerides | <input type="checkbox"/> | <input type="checkbox"/> | <input type="checkbox"/> | <input type="checkbox"/> | <input type="checkbox"/> |
| Dysautonomia                          | <input type="checkbox"/> | <input type="checkbox"/> | <input type="checkbox"/> | <input type="checkbox"/> | <input type="checkbox"/> |
| Hearing loss                          | <input type="checkbox"/> | <input type="checkbox"/> | <input type="checkbox"/> | <input type="checkbox"/> | <input type="checkbox"/> |
| Tinnitus (ringing in ears)            | <input type="checkbox"/> | <input type="checkbox"/> | <input type="checkbox"/> | <input type="checkbox"/> | <input type="checkbox"/> |
| Decreased vision                      | <input type="checkbox"/> | <input type="checkbox"/> | <input type="checkbox"/> | <input type="checkbox"/> | <input type="checkbox"/> |
| Retinal problems                      | <input type="checkbox"/> | <input type="checkbox"/> | <input type="checkbox"/> | <input type="checkbox"/> | <input type="checkbox"/> |
| Optic nerve problems                  | <input type="checkbox"/> | <input type="checkbox"/> | <input type="checkbox"/> | <input type="checkbox"/> | <input type="checkbox"/> |
| Eye muscle problems                   | <input type="checkbox"/> | <input type="checkbox"/> | <input type="checkbox"/> | <input type="checkbox"/> | <input type="checkbox"/> |
| Ptosis (drooping eyelids)             | <input type="checkbox"/> | <input type="checkbox"/> | <input type="checkbox"/> | <input type="checkbox"/> | <input type="checkbox"/> |

Confidential

Page 12 of 24

|                                      |                          |                          |                          |                          |                          |
|--------------------------------------|--------------------------|--------------------------|--------------------------|--------------------------|--------------------------|
| Balance problems                     | <input type="checkbox"/> | <input type="checkbox"/> | <input type="checkbox"/> | <input type="checkbox"/> | <input type="checkbox"/> |
| Peripheral neuropathy                | <input type="checkbox"/> | <input type="checkbox"/> | <input type="checkbox"/> | <input type="checkbox"/> | <input type="checkbox"/> |
| Gastrointestinal problems            | <input type="checkbox"/> | <input type="checkbox"/> | <input type="checkbox"/> | <input type="checkbox"/> | <input type="checkbox"/> |
| Difficulty falling or staying asleep | <input type="checkbox"/> | <input type="checkbox"/> | <input type="checkbox"/> | <input type="checkbox"/> | <input type="checkbox"/> |
| Sleep apnea                          | <input type="checkbox"/> | <input type="checkbox"/> | <input type="checkbox"/> | <input type="checkbox"/> | <input type="checkbox"/> |
| Heart muscle problems                | <input type="checkbox"/> | <input type="checkbox"/> | <input type="checkbox"/> | <input type="checkbox"/> | <input type="checkbox"/> |
| Heart rhythm problems                | <input type="checkbox"/> | <input type="checkbox"/> | <input type="checkbox"/> | <input type="checkbox"/> | <input type="checkbox"/> |
| Difficulty gaining weight            | <input type="checkbox"/> | <input type="checkbox"/> | <input type="checkbox"/> | <input type="checkbox"/> | <input type="checkbox"/> |
| Difficulty losing weight             | <input type="checkbox"/> | <input type="checkbox"/> | <input type="checkbox"/> | <input type="checkbox"/> | <input type="checkbox"/> |

What are the TOP 3 symptoms that would prompt you/your child to participate in a clinical trial?  
(Please pick 3 and only 3)

- Chronic fatigue
- Exercise intolerance
- Muscle weakness
- Developmental delay
- Epilepsy or seizures
- Stroke
- Speech problem
- Behavioral problems
- Mood disorder
- Headache
- Intellectual disability
- Learning disability
- Autism-spectrum behaviors
- Dehydration
- Liver disease
- Kidney disease
- Diabetes
- High cholesterol and/or triglycerides
- Dysautonomia
- Hearing loss
- Tinnitus (ringing in ears)
- Decreased vision
- Retinal problems
- Optic nerve problems
- Eye muscle problems
- Ptosis (drooping eyelids)
- Balance problems
- Peripheral neuropathy
- Gastrointestinal problems
- Difficulty falling or staying asleep
- Sleep apnea
- Heart muscle problems
- Heart rhythm problems
- Difficulty gaining weight
- Difficulty losing weight

---



---

**GOAL OF THE STUDY**

Please rate how each item would affect your decisions to participate or not participate in a clinical trial.

For questions that ask about you/your child, please respond based on who you are filling this survey out for (either for yourself or for your child).

**How likely would you/your child be to participate in a clinical trial if it is supposed to help with ...**

|                                                                                         | Would not Participate    | Unlikely to Participate  | Unsure                   | Likely to Participate    | Would Participate        |
|-----------------------------------------------------------------------------------------|--------------------------|--------------------------|--------------------------|--------------------------|--------------------------|
| Only one of the symptoms that you/your child experiences from the mitochondrial disease | <input type="checkbox"/> | <input type="checkbox"/> | <input type="checkbox"/> | <input type="checkbox"/> | <input type="checkbox"/> |
| Multiple symptoms that you/your child experience but not all of the symptoms            | <input type="checkbox"/> | <input type="checkbox"/> | <input type="checkbox"/> | <input type="checkbox"/> | <input type="checkbox"/> |
| All of the symptoms you/your child experience from the mitochondrial disease            | <input type="checkbox"/> | <input type="checkbox"/> | <input type="checkbox"/> | <input type="checkbox"/> | <input type="checkbox"/> |

---



---

**DESIGN OF THE STUDY**

Please rate how each item would affect your decisions to participate or not participate in a clinical trial.

For questions that ask about you/your child, please respond based on who you are filling this survey out for (either for yourself or for your child).

**How likely would you/your child be to participate in a clinical trial if it is...**

|                                       | Would not Participate    | Unlikely to Participate  | Neutral this would not affect the decision | Likely to Participate    | Would Participate        |
|---------------------------------------|--------------------------|--------------------------|--------------------------------------------|--------------------------|--------------------------|
| One day long                          | <input type="checkbox"/> | <input type="checkbox"/> | <input type="checkbox"/>                   | <input type="checkbox"/> | <input type="checkbox"/> |
| One week long                         | <input type="checkbox"/> | <input type="checkbox"/> | <input type="checkbox"/>                   | <input type="checkbox"/> | <input type="checkbox"/> |
| One month long                        | <input type="checkbox"/> | <input type="checkbox"/> | <input type="checkbox"/>                   | <input type="checkbox"/> | <input type="checkbox"/> |
| Several months (3-4 months) in length | <input type="checkbox"/> | <input type="checkbox"/> | <input type="checkbox"/>                   | <input type="checkbox"/> | <input type="checkbox"/> |
| One year in length                    | <input type="checkbox"/> | <input type="checkbox"/> | <input type="checkbox"/>                   | <input type="checkbox"/> | <input type="checkbox"/> |
| More than one year in length          | <input type="checkbox"/> | <input type="checkbox"/> | <input type="checkbox"/>                   | <input type="checkbox"/> | <input type="checkbox"/> |

---



---

**DESIGN OF THE STUDY**

Please rate how each item would affect your decisions to participate or not participate in a clinical trial.

For questions that ask about you/your child, please respond based on who you are filling this survey out for (either for yourself or for your child).

How likely would you/your child be to participate in a clinical trial that is designed so that...

|                                                                                                                                                                                                                    | Would not Participate    | Unlikely to Participate  | Neutral this would not affect the decision | Likely to Participate    | Would Participate        |
|--------------------------------------------------------------------------------------------------------------------------------------------------------------------------------------------------------------------|--------------------------|--------------------------|--------------------------------------------|--------------------------|--------------------------|
| Half of the people in the study get a placebo pill (inactive drug) and the other half get the active drug                                                                                                          | <input type="checkbox"/> | <input type="checkbox"/> | <input type="checkbox"/>                   | <input type="checkbox"/> | <input type="checkbox"/> |
| Half of the people in the study get the active drug and the other half get a placebo pill (inactive drug)                                                                                                          | <input type="checkbox"/> | <input type="checkbox"/> | <input type="checkbox"/>                   | <input type="checkbox"/> | <input type="checkbox"/> |
| You sequentially take several different drugs or placebos each for a defined time period in an unpredictable order (ie. take drug A for one month, then take drug B for one month, then take drug C for one month) | <input type="checkbox"/> | <input type="checkbox"/> | <input type="checkbox"/>                   | <input type="checkbox"/> | <input type="checkbox"/> |
| There is a chance of only getting the placebo (inactive drug)                                                                                                                                                      | <input type="checkbox"/> | <input type="checkbox"/> | <input type="checkbox"/>                   | <input type="checkbox"/> | <input type="checkbox"/> |
| Everyone gets the drug and placebo at some point                                                                                                                                                                   | <input type="checkbox"/> | <input type="checkbox"/> | <input type="checkbox"/>                   | <input type="checkbox"/> | <input type="checkbox"/> |
| Everyone gets the drug and no one gets a placebo                                                                                                                                                                   | <input type="checkbox"/> | <input type="checkbox"/> | <input type="checkbox"/>                   | <input type="checkbox"/> | <input type="checkbox"/> |
| Neither you nor the study team know whether you are receiving the drug or placebo                                                                                                                                  | <input type="checkbox"/> | <input type="checkbox"/> | <input type="checkbox"/>                   | <input type="checkbox"/> | <input type="checkbox"/> |
| Only you do not know which treatment you are receiving                                                                                                                                                             | <input type="checkbox"/> | <input type="checkbox"/> | <input type="checkbox"/>                   | <input type="checkbox"/> | <input type="checkbox"/> |
| Only your doctor does not know which treatment you are receiving                                                                                                                                                   | <input type="checkbox"/> | <input type="checkbox"/> | <input type="checkbox"/>                   | <input type="checkbox"/> | <input type="checkbox"/> |
| The study team selects whether you receive the drug or placebo                                                                                                                                                     | <input type="checkbox"/> | <input type="checkbox"/> | <input type="checkbox"/>                   | <input type="checkbox"/> | <input type="checkbox"/> |
| You select whether you receive the drug or placebo                                                                                                                                                                 | <input type="checkbox"/> | <input type="checkbox"/> | <input type="checkbox"/>                   | <input type="checkbox"/> | <input type="checkbox"/> |

*Confidential*

Page 16 of 24

|                                                                                                          |                          |                          |                          |                          |                          |
|----------------------------------------------------------------------------------------------------------|--------------------------|--------------------------|--------------------------|--------------------------|--------------------------|
| There is random assignment of who receives the drug or placebo                                           | <input type="checkbox"/> | <input type="checkbox"/> | <input type="checkbox"/> | <input type="checkbox"/> | <input type="checkbox"/> |
| You could be randomized to either take the new treatment or continue your regular mitochondrial cocktail | <input type="checkbox"/> | <input type="checkbox"/> | <input type="checkbox"/> | <input type="checkbox"/> | <input type="checkbox"/> |
| You are already enrolled in another clinical trial at the same time                                      | <input type="checkbox"/> | <input type="checkbox"/> | <input type="checkbox"/> | <input type="checkbox"/> | <input type="checkbox"/> |
| You are guaranteed the drug after the study ends                                                         | <input type="checkbox"/> | <input type="checkbox"/> | <input type="checkbox"/> | <input type="checkbox"/> | <input type="checkbox"/> |

---



---

**DESIGN OF THE STUDY**

Please rate how each item would affect your decisions to participate or not participate in a clinical trial.

For questions that ask about you/your child, please respond based on who you are filling this survey out for (either for yourself or for your child).

How likely would you/your child be to participate if the clinical trial involves...

|                                                         | Would not Participate    | Unlikely to Participate  | Neutral this would not affect the decision | Likely to Participate    | Would Participate        |
|---------------------------------------------------------|--------------------------|--------------------------|--------------------------------------------|--------------------------|--------------------------|
| Daily blood tests                                       | <input type="checkbox"/> | <input type="checkbox"/> | <input type="checkbox"/>                   | <input type="checkbox"/> | <input type="checkbox"/> |
| Weekly blood tests                                      | <input type="checkbox"/> | <input type="checkbox"/> | <input type="checkbox"/>                   | <input type="checkbox"/> | <input type="checkbox"/> |
| Monthly blood tests                                     | <input type="checkbox"/> | <input type="checkbox"/> | <input type="checkbox"/>                   | <input type="checkbox"/> | <input type="checkbox"/> |
| 2 blood tests (one at the beginning and one at the end) | <input type="checkbox"/> | <input type="checkbox"/> | <input type="checkbox"/>                   | <input type="checkbox"/> | <input type="checkbox"/> |
| Urine tests                                             | <input type="checkbox"/> | <input type="checkbox"/> | <input type="checkbox"/>                   | <input type="checkbox"/> | <input type="checkbox"/> |
| Stool tests                                             | <input type="checkbox"/> | <input type="checkbox"/> | <input type="checkbox"/>                   | <input type="checkbox"/> | <input type="checkbox"/> |
| An electrocardiogram (ECG)                              | <input type="checkbox"/> | <input type="checkbox"/> | <input type="checkbox"/>                   | <input type="checkbox"/> | <input type="checkbox"/> |
| An echocardiogram (heart ultrasound)                    | <input type="checkbox"/> | <input type="checkbox"/> | <input type="checkbox"/>                   | <input type="checkbox"/> | <input type="checkbox"/> |
| Heart rate monitoring                                   | <input type="checkbox"/> | <input type="checkbox"/> | <input type="checkbox"/>                   | <input type="checkbox"/> | <input type="checkbox"/> |
| Exercise tests                                          | <input type="checkbox"/> | <input type="checkbox"/> | <input type="checkbox"/>                   | <input type="checkbox"/> | <input type="checkbox"/> |
| An X-ray                                                | <input type="checkbox"/> | <input type="checkbox"/> | <input type="checkbox"/>                   | <input type="checkbox"/> | <input type="checkbox"/> |
| An MRI                                                  | <input type="checkbox"/> | <input type="checkbox"/> | <input type="checkbox"/>                   | <input type="checkbox"/> | <input type="checkbox"/> |
| An ultrasound                                           | <input type="checkbox"/> | <input type="checkbox"/> | <input type="checkbox"/>                   | <input type="checkbox"/> | <input type="checkbox"/> |
| Having an IV placed                                     | <input type="checkbox"/> | <input type="checkbox"/> | <input type="checkbox"/>                   | <input type="checkbox"/> | <input type="checkbox"/> |
| Visits to the research site or a hospital               | <input type="checkbox"/> | <input type="checkbox"/> | <input type="checkbox"/>                   | <input type="checkbox"/> | <input type="checkbox"/> |
| Overnight hospital visits                               | <input type="checkbox"/> | <input type="checkbox"/> | <input type="checkbox"/>                   | <input type="checkbox"/> | <input type="checkbox"/> |
| No traveling at all                                     | <input type="checkbox"/> | <input type="checkbox"/> | <input type="checkbox"/>                   | <input type="checkbox"/> | <input type="checkbox"/> |
| Traveling within your city or town                      | <input type="checkbox"/> | <input type="checkbox"/> | <input type="checkbox"/>                   | <input type="checkbox"/> | <input type="checkbox"/> |
| Traveling to another state                              | <input type="checkbox"/> | <input type="checkbox"/> | <input type="checkbox"/>                   | <input type="checkbox"/> | <input type="checkbox"/> |
| International travel to another country                 | <input type="checkbox"/> | <input type="checkbox"/> | <input type="checkbox"/>                   | <input type="checkbox"/> | <input type="checkbox"/> |
| Traveling while you are experiencing symptoms           | <input type="checkbox"/> | <input type="checkbox"/> | <input type="checkbox"/>                   | <input type="checkbox"/> | <input type="checkbox"/> |
| Traveling when you are feeling good enough to travel    | <input type="checkbox"/> | <input type="checkbox"/> | <input type="checkbox"/>                   | <input type="checkbox"/> | <input type="checkbox"/> |



*Confidential*

Page 18 of 24

|                                                               |                          |                          |                          |                          |                          |
|---------------------------------------------------------------|--------------------------|--------------------------|--------------------------|--------------------------|--------------------------|
| No payment or monetary reimbursement                          | <input type="checkbox"/> | <input type="checkbox"/> | <input type="checkbox"/> | <input type="checkbox"/> | <input type="checkbox"/> |
| A cash incentive to participate                               | <input type="checkbox"/> | <input type="checkbox"/> | <input type="checkbox"/> | <input type="checkbox"/> | <input type="checkbox"/> |
| A gift card incentive to participate                          | <input type="checkbox"/> | <input type="checkbox"/> | <input type="checkbox"/> | <input type="checkbox"/> | <input type="checkbox"/> |
| You having to make a payment in order to be part of the trial | <input type="checkbox"/> | <input type="checkbox"/> | <input type="checkbox"/> | <input type="checkbox"/> | <input type="checkbox"/> |

---



---

**DESIGN OF THE STUDY**

Please rate how each item would affect your decisions to participate or not participate in a clinical trial.

For questions that ask about you/your child, please respond based on who you are filling this survey out for (either for yourself or for your child).

How likely would you/your child be to participate if the clinical trial is ...

|                                                                                 | Would not Participate    | Unlikely to Participate  | Neutral this would not affect the decision | Likely to Participate    | Would Participate        |
|---------------------------------------------------------------------------------|--------------------------|--------------------------|--------------------------------------------|--------------------------|--------------------------|
| Conducted by your local doctor                                                  | <input type="checkbox"/> | <input type="checkbox"/> | <input type="checkbox"/>                   | <input type="checkbox"/> | <input type="checkbox"/> |
| Conducted by an academic hospital                                               | <input type="checkbox"/> | <input type="checkbox"/> | <input type="checkbox"/>                   | <input type="checkbox"/> | <input type="checkbox"/> |
| Conducted by a pharmaceutical company                                           | <input type="checkbox"/> | <input type="checkbox"/> | <input type="checkbox"/>                   | <input type="checkbox"/> | <input type="checkbox"/> |
| Conducted by a patient advocacy group or support group                          | <input type="checkbox"/> | <input type="checkbox"/> | <input type="checkbox"/>                   | <input type="checkbox"/> | <input type="checkbox"/> |
| A single-site trial                                                             | <input type="checkbox"/> | <input type="checkbox"/> | <input type="checkbox"/>                   | <input type="checkbox"/> | <input type="checkbox"/> |
| A multi-site trial (different locations are working together on the same trial) | <input type="checkbox"/> | <input type="checkbox"/> | <input type="checkbox"/>                   | <input type="checkbox"/> | <input type="checkbox"/> |
| In phase 1 (screening for safety)                                               | <input type="checkbox"/> | <input type="checkbox"/> | <input type="checkbox"/>                   | <input type="checkbox"/> | <input type="checkbox"/> |
| In phase 2 (establishing the efficacy of the drug, usually against a placebo)   | <input type="checkbox"/> | <input type="checkbox"/> | <input type="checkbox"/>                   | <input type="checkbox"/> | <input type="checkbox"/> |
| In phase 3 (final confirmation of safety and efficacy)                          | <input type="checkbox"/> | <input type="checkbox"/> | <input type="checkbox"/>                   | <input type="checkbox"/> | <input type="checkbox"/> |

---



---

**ADDITIONAL FACTORS**

**Please rate how each item would affect your decisions to participate or not participate in a clinical trial.**

**Would the following factor(s) influence your decision to participate in a clinical trial:**

|                                                                                  | Yes more likely to participate | Yes less likely to participate | No would not influence   |
|----------------------------------------------------------------------------------|--------------------------------|--------------------------------|--------------------------|
| Potential to benefit yourself                                                    | <input type="checkbox"/>       | <input type="checkbox"/>       | <input type="checkbox"/> |
| Potential to benefit your family                                                 | <input type="checkbox"/>       | <input type="checkbox"/>       | <input type="checkbox"/> |
| Potential to benefit other affected individuals                                  | <input type="checkbox"/>       | <input type="checkbox"/>       | <input type="checkbox"/> |
| Potential to aid in science and scientific advancement                           | <input type="checkbox"/>       | <input type="checkbox"/>       | <input type="checkbox"/> |
| No other treatment options exist                                                 | <input type="checkbox"/>       | <input type="checkbox"/>       | <input type="checkbox"/> |
| No other affordable treatment options                                            | <input type="checkbox"/>       | <input type="checkbox"/>       | <input type="checkbox"/> |
| The same treatment is not available clinically                                   | <input type="checkbox"/>       | <input type="checkbox"/>       | <input type="checkbox"/> |
| The same treatment is available outside of the trial but too expensive to access | <input type="checkbox"/>       | <input type="checkbox"/>       | <input type="checkbox"/> |
| Access to free healthcare                                                        | <input type="checkbox"/>       | <input type="checkbox"/>       | <input type="checkbox"/> |
| Apparent risks will outweigh the benefit                                         | <input type="checkbox"/>       | <input type="checkbox"/>       | <input type="checkbox"/> |
| Apparent benefits will outweigh the risks                                        | <input type="checkbox"/>       | <input type="checkbox"/>       | <input type="checkbox"/> |
| No prospective self benefit                                                      | <input type="checkbox"/>       | <input type="checkbox"/>       | <input type="checkbox"/> |
| Possibility to cure your disease                                                 | <input type="checkbox"/>       | <input type="checkbox"/>       | <input type="checkbox"/> |
| Possibility to prevent progression of your disease                               | <input type="checkbox"/>       | <input type="checkbox"/>       | <input type="checkbox"/> |
| Possibility to treat some symptoms of your disease                               | <input type="checkbox"/>       | <input type="checkbox"/>       | <input type="checkbox"/> |
| Potential of worsening your disease                                              | <input type="checkbox"/>       | <input type="checkbox"/>       | <input type="checkbox"/> |
| Potential of experiencing transient major side effects                           | <input type="checkbox"/>       | <input type="checkbox"/>       | <input type="checkbox"/> |
| Potential of experiencing transient minor side effects                           | <input type="checkbox"/>       | <input type="checkbox"/>       | <input type="checkbox"/> |
| Potential for death from study participation                                     | <input type="checkbox"/>       | <input type="checkbox"/>       | <input type="checkbox"/> |

*Confidential*

Page 21 of 24

- |                                                     |                          |                          |                          |
|-----------------------------------------------------|--------------------------|--------------------------|--------------------------|
| Potential for closer monitoring of your health      | <input type="checkbox"/> | <input type="checkbox"/> | <input type="checkbox"/> |
| Potential out-of-pocket expenses                    | <input type="checkbox"/> | <input type="checkbox"/> | <input type="checkbox"/> |
| Desire to participate in any clinical trial         | <input type="checkbox"/> | <input type="checkbox"/> | <input type="checkbox"/> |
| Desire to avoid participation in any clinical trial | <input type="checkbox"/> | <input type="checkbox"/> | <input type="checkbox"/> |

---



---

**ADDITIONAL FACTORS**

Please rate how each item would affect your decisions to participate or not participate in a clinical trial.

For questions that ask about you/your child, please respond based on who you are filling this survey out for (either for yourself or for your child).

How likely would you/your child be to participate in a clinical trial if you learned about the trial through...

|                                                                           | Would not Participate    | Unlikely to Participate  | this would not affect the decision | Likely to Participate    | Would Participate        |
|---------------------------------------------------------------------------|--------------------------|--------------------------|------------------------------------|--------------------------|--------------------------|
| Your primary care physician                                               | <input type="checkbox"/> | <input type="checkbox"/> | <input type="checkbox"/>           | <input type="checkbox"/> | <input type="checkbox"/> |
| One of your medical specialists                                           | <input type="checkbox"/> | <input type="checkbox"/> | <input type="checkbox"/>           | <input type="checkbox"/> | <input type="checkbox"/> |
| A healthy family member                                                   | <input type="checkbox"/> | <input type="checkbox"/> | <input type="checkbox"/>           | <input type="checkbox"/> | <input type="checkbox"/> |
| A family member that was already in the clinical trial                    | <input type="checkbox"/> | <input type="checkbox"/> | <input type="checkbox"/>           | <input type="checkbox"/> | <input type="checkbox"/> |
| A healthy friend                                                          | <input type="checkbox"/> | <input type="checkbox"/> | <input type="checkbox"/>           | <input type="checkbox"/> | <input type="checkbox"/> |
| A friend who also has a mitochondrial disease                             | <input type="checkbox"/> | <input type="checkbox"/> | <input type="checkbox"/>           | <input type="checkbox"/> | <input type="checkbox"/> |
| Another participant that was already in the clinical trial                | <input type="checkbox"/> | <input type="checkbox"/> | <input type="checkbox"/>           | <input type="checkbox"/> | <input type="checkbox"/> |
| A support group or patient advocacy group                                 | <input type="checkbox"/> | <input type="checkbox"/> | <input type="checkbox"/>           | <input type="checkbox"/> | <input type="checkbox"/> |
| The NIH clinical trials website                                           | <input type="checkbox"/> | <input type="checkbox"/> | <input type="checkbox"/>           | <input type="checkbox"/> | <input type="checkbox"/> |
| A newspaper article                                                       | <input type="checkbox"/> | <input type="checkbox"/> | <input type="checkbox"/>           | <input type="checkbox"/> | <input type="checkbox"/> |
| A social media website                                                    | <input type="checkbox"/> | <input type="checkbox"/> | <input type="checkbox"/>           | <input type="checkbox"/> | <input type="checkbox"/> |
| The internet                                                              | <input type="checkbox"/> | <input type="checkbox"/> | <input type="checkbox"/>           | <input type="checkbox"/> | <input type="checkbox"/> |
| The television                                                            | <input type="checkbox"/> | <input type="checkbox"/> | <input type="checkbox"/>           | <input type="checkbox"/> | <input type="checkbox"/> |
| A flyer                                                                   | <input type="checkbox"/> | <input type="checkbox"/> | <input type="checkbox"/>           | <input type="checkbox"/> | <input type="checkbox"/> |
| A letter mailed to your home                                              | <input type="checkbox"/> | <input type="checkbox"/> | <input type="checkbox"/>           | <input type="checkbox"/> | <input type="checkbox"/> |
| A phonecall from the study team                                           | <input type="checkbox"/> | <input type="checkbox"/> | <input type="checkbox"/>           | <input type="checkbox"/> | <input type="checkbox"/> |
| An email from the study team                                              | <input type="checkbox"/> | <input type="checkbox"/> | <input type="checkbox"/>           | <input type="checkbox"/> | <input type="checkbox"/> |
| An email from the North American Mitochondrial Disease Consortium (NAMDC) | <input type="checkbox"/> | <input type="checkbox"/> | <input type="checkbox"/>           | <input type="checkbox"/> | <input type="checkbox"/> |

---



---

**ADDITIONAL FACTORS**

Please rate how each item would affect your decisions to participate or not participate in a clinical trial.

For questions that ask about you/your child, please respond based on who you are filling this survey out for (either for yourself or for your child).

**How likely are you/your child to participate in a clinical trial knowing that...**

|                                                                                      | Would not Participate    | Unlikely to Participate  | this would not affect the decision | Likely to Participate    | Would Participate        |
|--------------------------------------------------------------------------------------|--------------------------|--------------------------|------------------------------------|--------------------------|--------------------------|
| Your genetic information is being analyzed                                           | <input type="checkbox"/> | <input type="checkbox"/> | <input type="checkbox"/>           | <input type="checkbox"/> | <input type="checkbox"/> |
| Your genetic information cannot affect your medical insurance policy                 | <input type="checkbox"/> | <input type="checkbox"/> | <input type="checkbox"/>           | <input type="checkbox"/> | <input type="checkbox"/> |
| Your genetic information can affect your ability to purchase a life insurance policy | <input type="checkbox"/> | <input type="checkbox"/> | <input type="checkbox"/>           | <input type="checkbox"/> | <input type="checkbox"/> |
| Your genetic information can affect your ability to qualify for disability insurance | <input type="checkbox"/> | <input type="checkbox"/> | <input type="checkbox"/>           | <input type="checkbox"/> | <input type="checkbox"/> |

---

---

**COMMENTS**

Please provide any additional comments:

---

Do you plan to fill out the survey again for either yourself or your child?

- Yes
- No
