# Supplementary material for: Mitochondrial disease patient motivations and barriers to participate in clinical trials
Source: PubMed Central journal article supplement (PMC5957366; doi:10.1371/journal.pone.0197513), 2018-05-17
Supplement: pone.0197513.s002.pdf [file pone.0197513.s002.pdf]

**S1A Table. Symptoms Experienced by All patients, Adults and Children.**

| All (N=30) <sup>1</sup>   |               | Adults (N=15) <sup>1</sup> |               | Children (N=15) <sup>1</sup> |               |
|---------------------------|---------------|----------------------------|---------------|------------------------------|---------------|
| Symptom                   | % (n)         | Symptom                    | % (n)         | Symptom                      | % (n)         |
| Muscle weakness           | 100.0 (30/30) | Muscle weakness            | 100.0 (15/15) | Muscle weakness              | 100.0 (15/15) |
| Chronic Fatigue           | 96.7 (29/30)  | Chronic fatigue            | 100.0 (15/15) | Developmental Delay          | 100.0 (15/15) |
| Balance Problem           | 90.0 (27/30)  | Gastrointestinal           | 93.3 (14/15)  | Chronic Fatigue              | 93.3 (14/15)  |
| Exercise Intolerance      | 89.7 (26/29)  | Exercise Intolerance       | 92.9 (13/14)  | Balance Problem              | 93.3 (14/15)  |
| Gastrointestinal          | 86.2 (25/29)  | Balance Problem            | 86.7 (13/15)  | Exercise Intolerance         | 86.7 (13/15)  |
| Decreased Vision          | 76.7 (23/30)  | Decreased Vision           | 80.0 (12/15)  | Speech problem               | 86.7 (13/15)  |
| Headache                  | 70.4 (19/27)  | Difficulty sleeping        | 78.6 (11/14)  | Intellectual Disability      | 84.6 (11/13)  |
| Speech problem            | 70.0 (21/30)  | Headache                   | 73.3 (11/15)  | Learning Disability          | 78.6 (11/14)  |
| Difficulty Sleeping       | 65.5 (19/29)  | Peripheral neuropathy      | 71.4 (10/14)  | Gastrointestinal             | 78.6 (11/14)  |
| Dehydration               | 62.1 (18/29)  | Dehydration                | 66.7 (10/15)  | Decreased Vision             | 73.3 (11/15)  |
| Developmental Delay       | 56.7 (17/30)  | Hypercholesterolemia       | 66.7 (10/15)  | Difficulty gaining weight    | 73.3 (11/15)  |
| Intellectual Disability   | 55.6 (15/27)  | Ptosis                     | 64.3 (9/14)   | Epilepsy                     | 66.7 (10/15)  |
| Peripheral Neuropathy     | 55.6 (15/27)  | Speech problem             | 53.3 (8/15)   | Headache                     | 66.7 (8/12)   |
| Learning Disability       | 53.6 (15/28)  | Hearing Loss               | 53.3 (8/15)   | Dehydration                  | 57.1 (8/14)   |
| Difficulty Gaining Weight | 53.3 (16/30)  | Dysautonomia               | 50.0 (6/12)   | Difficulty Sleeping          | 53.3 (8/15)   |
| Heart Rhythm problems     | 48.3 (14/29)  | Heart Rhythm problems      | 50.0 (7/14)   | Heart Rhythm problems        | 46.7 (7/15)   |
| Hypercholesterolemia      | 46.7 (14/30)  | Mood disorder              | 46.7 (7/15)   | Behavior problems            | 40.0 (6/15)   |
| Ptosis                    | 44.8 (13/29)  | Tinnitus                   | 46.7 (7/15)   | Dysautonomia                 | 38.5 (5/13)   |
| Dysautonomia              | 44.0 (11/25)  | Eye muscle problems        | 42.9 (6/14)   | Peripheral neuropathy        | 38.5 (5/13)   |
| Epilepsy                  | 43.3 (13/30)  | Difficulty losing weight   | 38.5 (5/13)   | Optic Nerve problems         | 35.7 (5/14)   |
| Eye muscle problems       | 37.9 (11/29)  | Behavioral Problems        | 33.3 (5/15)   | Sleep Apnea                  | 35.7 (5/14)   |
| Behavioral problems       | 36.7 (11/30)  | Diabetes                   | 33.3 (5/15)   | Eye muscle problems          | 33.3 (5/15)   |
| Mood Disorder             | 36.7 (11/30)  | Sleep apnea                | 33.3 (5/15)   | Autism Spectrum              | 33.3 (5/15)   |

|                          |              |                           |             |                          |             |
|--------------------------|--------------|---------------------------|-------------|--------------------------|-------------|
| Sleep apnea              | 34.5 (10/29) | Difficulty gaining weight | 33.3 (5/15) | Mood Disorder            | 26.7 (4/15) |
| Hearing Loss             | 33.3 (10/30) | Intellectual Disability   | 28.6 (4/14) | Kidney Disorders         | 26.7 (4/15) |
| Optic nerve problems     | 31.0 (9/29)  | Learning Disability       | 28.6 (4/14) | Hypercholesterolemia     | 26.7 (4/15) |
| Difficulty losing weight | 25.9 (7/27)  | Heart muscle problems     | 28.6 (4/14) | Ptosis                   | 26.7 (4/15) |
| Tinnitus                 | 25.0 (7/28)  | Optic nerve problems      | 26.7 (4/15) | Heart Muscle problems    | 20.0 (3/15) |
| Heart muscle problems    | 24.1 (7/29)  | Epilepsy                  | 20.0 (3/15) | Retinal problems         | 14.3 (2/14) |
| Kidney Disorders         | 20.0 (6/30)  | Liver disease             | 20.0 (3/15) | Difficulty losing weight | 14.3 (2/14) |
| Autism Spectrum          | 16.7 (5/30)  | Developmental Delay       | 13.3 (2/15) | Stroke                   | 13.3 (2/15) |
| Diabetes                 | 16.7 (5/30)  | Stroke                    | 13.3 (2/15) | Hearing Loss             | 13.3 (2/15) |
| Stroke                   | 13.3 (4/30)  | Kidney Disorders          | 13.3 (2/15) | Liver disease            | 6.7 (1/15)  |
| Liver disease            | 13.3 (4/30)  | Retinal problems          | 6.7 (1/15)  | Diabetes                 | 0 (0/15)    |
| Retinal problems         | 10.3 (3/29)  | Autism Spectrum           | 0.0 (0/15)  | Tinnitus                 | 0 (0/13)    |

**Nonrespondents on individual symptoms (maximum 3 [20%] for Adults and 3 [20%] for Children) are excluded. Lower denominator (N) indicates the total number of respondents.**

**S1B Table. All patients, Adults and Children likely to participate<sup>1</sup> in a clinical trial, by symptom targeted.**

| All (N=30) <sup>2</sup>       |               | Adults (N=15) <sup>2</sup>    |               | Children (N=15) <sup>2</sup>  |               |
|-------------------------------|---------------|-------------------------------|---------------|-------------------------------|---------------|
| Symptom targeted by the trial | % (n)         | Symptom targeted by the trial | % (n)         | Symptom targeted by the trial | % (n)         |
| Muscle weakness               | 100.0 (27/27) | Exercise intolerance          | 100.0 (14/14) | Muscle weakness               | 100.0 (13/13) |
| Chronic fatigue               | 85.7 (24/28)  | Muscle weakness               | 100.0 (14/14) | Developmental delay           | 100.0 (14/14) |
| Exercise Intolerance          | 82.1 (23/28)  | Chronic fatigue               | 92.9 (13/14)  | Intellectual disability       | 85.7 (12/14)  |
| Gastrointestinal problems     | 74.1 (20/27)  | Sleep problems                | 85.7 (12/14)  | Learning disability           | 85.7 (12/14)  |
| Balance problems              | 67.9 (19/28)  | Gastrointestinal problems     | 84.6 (11/13)  | Chronic fatigue               | 78.6 (11/14)  |
| Developmental Delay           | 65.4 (17/26)  | Hyperlipidemia                | 75.0 (9/12)   | Speech problems               | 71.4 (10/14)  |
| Learning disability           | 65.4 (17/26)  | Decreased vision              | 69.2 (9/13)   | Balance Problems              | 71.4 (10/14)  |
| Decreased vision              | 65.4 (17/26)  | Peripheral neuropathy         | 69.2 (9/13)   | Exercise intolerance          | 64.3 (9/14)   |
| Speech problem                | 63.0 (17/27)  | Dysautonomia                  | 66.7 (8/12)   | Gastrointestinal problems     | 64.3 (9/14)   |
| Intellectual disability       | 61.5 (16/26)  | Tinnitus                      | 66.7 (8/12)   | Decreased vision              | 61.5 (8/13)   |
| Sleep problems                | 60.7 (17/28)  | Balance problems              | 64.3 (9/14)   | Epilepsy                      | 50.0 (7/14)   |
| Peripheral neuropathy         | 59.3 (16/27)  | Headache                      | 61.5 (8/13)   | Optic nerve problems          | 50.0 (7/14)   |
| Eye muscle problems           | 55.6 (15/27)  | Diabetes                      | 61.5 (8/13)   | Eye muscle problems           | 50.0 (7/14)   |
| Dysautonomia                  | 53.8 (14/26)  | Eye muscle problems           | 61.5 (8/13)   | Peripheral Neuropathy         | 50.0 (7/14)   |
| Hyperlipidemia                | 50.0 (13/26)  | Dehydration                   | 58.3 (7/12)   | Dysautonomia                  | 42.9 (6/14)   |
| Optic nerve problems          | 48.1 (13/27)  | Heart rhythm problems         | 58.3 (7/12)   | Difficulty gaining weight     | 42.9 (6/14)   |
| Headache                      | 48.1 (13/27)  | Hearing loss                  | 57.1 (8/14)   | Stroke                        | 35.7 (5/14)   |
| Epilepsy                      | 46.2 (12/26)  | Liver disease                 | 54.5 (6/11)   | Behavioral problems           | 35.7 (5/14)   |
| Dehydration                   | 46.2 (12/26)  | Speech problems               | 53.8 (7/13)   | Headache                      | 35.7 (5/14)   |
| Difficulty gaining weight     | 44.4 (12/27)  | Mood disorder                 | 53.8 (7/13)   | Kidney disease                | 35.7 (5/14)   |
| Hearing loss                  | 42.9 (12/28)  | Ptosis                        | 53.8 (7/13)   | Retinal problems              | 35.7 (5/14)   |
| Kidney disease                | 42.3 (11/26)  | Kidney disease                | 50.0 (6/12)   | Sleep problems                | 35.7 (5/14)   |
| Heart rhythm problems         | 42.3 (11/26)  | Heart muscle problems         | 50.0 (6/12)   | Dehydration                   | 35.7 (5/14)   |
| Ptosis                        | 40.7 (11/27)  | Optic nerve problems          | 46.2 (6/13)   | Mood disorder                 | 28.6 (4/14)   |

|                          |              |                           |             |                           |             |
|--------------------------|--------------|---------------------------|-------------|---------------------------|-------------|
| Mood disorder            | 40.7 (11/27) | Difficulty gaining weight | 46.2 (6/13) | Autism-spectrum behaviors | 28.6 (4/14) |
| Stroke                   | 38.5 (10/26) | Epilepsy                  | 41.7 (5/12) | Hyperlipidemia            | 28.6 (4/14) |
| Tinnitus                 | 38.5 (10/26) | Stroke                    | 41.7 (5/12) | Hearing loss              | 28.6 (4/14) |
| Retinal problems         | 38.5 (10/26) | Learning disability       | 41.7 (5/12) | Ptosis                    | 28.6 (4/14) |
| Diabetes                 | 37.0 (10/27) | Retinal problems          | 41.7 (5/12) | Heart rhythm problems     | 28.6 (4/14) |
| Heart muscle problems    | 34.6 (9/26)  | Difficulty losing weight  | 41.7 (5/12) | Sleep apnea               | 21.4 (3/14) |
| Behavior problem         | 33.3 (9/27)  | Intellectual disability   | 33.3 (4/12) | Heart muscle problems     | 21.4 (3/14) |
| Liver disease            | 32.0 (8/25)  | Sleep apnea               | 33.3 (4/12) | Difficulty losing weight  | 21.4 (3/14) |
| Difficulty losing weight | 30.8 (8/26)  | Behavioral problems       | 30.8 (4/13) | Liver disease             | 14.3 (2/14) |
| Autism spectrum behavior | 26.9 (7/26)  | Developmental delay       | 25.0 (3/12) | Diabetes                  | 14.3 (2/14) |
| Sleep apnea              | 26.9 (7/26)  | Autism spectrum behavior  | 25.0 (3/12) | Tinnitus                  | 14.3 (2/14) |

<sup>1</sup> Respondents coded “likely to participate” responded “Would Participate” or “Likely to participate” in a trial aiming to treat the listed symptom.

<sup>2</sup> **Nonrespondents on individual symptoms (maximum of 4 [26.7]% for Adults and 2 for Children [13.3]%) are excluded. Lower denominator (N) indicates the total number of respondents.**

**S1C Table. All patients, Adults and Children likely to participate<sup>1</sup> in a clinical trial if experienced symptom is targeted.**

| <b>All (N=30)<sup>2</sup></b>                    |               | <b>Adults (N=15)<sup>2</sup></b>                 |               | <b>Children (N=15)<sup>2</sup></b>               |               |
|--------------------------------------------------|---------------|--------------------------------------------------|---------------|--------------------------------------------------|---------------|
| <b>Experienced symptom targeted by the trial</b> | <b>% (n)</b>  | <b>Experienced symptom targeted by the trial</b> | <b>% (n)</b>  | <b>Experienced symptom targeted by the trial</b> | <b>% (n)</b>  |
| Muscle Weakness                                  | 100.0 (27/27) | Muscle Weakness                                  | 100.0 (14/14) | Muscle Weakness                                  | 100.0 (13/13) |
| Peripheral Neuropathy                            | 100.0 (13/13) | Exercise Intolerance                             | 100.0 (12/12) | Developmental Delay                              | 100.0 (14/14) |
| Tinnitus                                         | 100.0 (7/7)   | Peripheral Neuropathy                            | 100.0 (9/9)   | Learning Disability                              | 100.0 (10/10) |
| Diabetes                                         | 100.0 (4/4)   | Tinnitus                                         | 100.0 (7/7)   | Dysautonomia                                     | 100.0 (4/4)   |
| Stroke                                           | 100.0 (3/3)   | Difficulty Gaining Weight                        | 100.0 (5/5)   | Optic Nerve Problems                             | 100 (4/4)     |
| Retinal Problems                                 | 100.0 (2/2)   | Diabetes                                         | 100.0 (4/4)   | Peripheral Neuropathy                            | 100 (4/4)     |
| Liver Disease                                    | 100.0 (1/1)   | Stroke                                           | 100.0 (2/2)   | Stroke                                           | 100.0 (1/1)   |
| Delayed Milestones                               | 93.8 (15/16)  | Kidney Disease                                   | 100.0 (2/2)   | Retinal Problems                                 | 100.0 (1/1)   |
| Gastrointestinal Problems                        | 90.9 (20/22)  | Liver Disease                                    | 100.0 (1/1)   | Gastrointestinal Problems                        | 90 (9/10)     |
| Dysautonomia                                     | 88.9 (8/9)    | Retinal Problems                                 | 100.0 (1/1)   | Intellectual Disability                          | 90.0 (9/10)   |
| Optic Nerve Problems                             | 87.5 (7/8)    | Chronic Fatigue                                  | 92.9 (13/14)  | Behavioral Problems                              | 80.0 (4/5)    |
| Learning Disabilities                            | 85.7 (12/14)  | Gastrointestinal Problems                        | 91.7 (11/12)  | Eye Muscle Problems                              | 80.0 (4/5)    |
| Chronic Fatigue                                  | 85.2 (23/27)  | Sleep Difficulties                               | 90.9 (10/11)  | Decreased Vision                                 | 77.8 (7/9)    |
| Exercise Intolerance                             | 83.3 (20/24)  | Hyperlipidemia                                   | 87.5 (7/8)    | Chronic Fatigue                                  | 76.9 (10/13)  |
| Sleep Difficulties                               | 83.3 (15/18)  | Mood Disorder                                    | 85.7 (6/7)    | Speech Problems                                  | 76.9 (10/13)  |
| Kidney Disease                                   | 83.3 (5/6)    | Eye Muscle Problems                              | 83.3 (5/6)    | Balance Problems                                 | 76.9 (10/13)  |
| Eye Muscle Problems                              | 81.8 (9/11)   | Decreased Vision                                 | 81.8 (9/11)   | Kidney Disease                                   | 75.0 (3/4)    |
| Decreased Vision                                 | 80.0 (16/20)  | Dysautonomia                                     | 80.0 (4/5)    | Sleep Difficulties                               | 71.4 (5/7)    |
| Mood Disorder                                    | 80.0 (8/10)   | Balance Problems                                 | 75.0 (9/12)   | Exercise Intolerance                             | 66.7 (8/12)   |
| Intellectual Disability                          | 78.6 (11/14)  | Optic Nerve Problems                             | 75.0 (3/4)    | Epilepsy                                         | 66.7 (6/9)    |
| Speech Problem                                   | 76.2 (16/21)  | Speech Problems                                  | 75.0 (6/8)    | Mood Disorder                                    | 66.7 (2/3)    |
| Balance Problems                                 | 76.0 (19/25)  | Heart Rhythm Problems                            | 71.4 (5/7)    | Ptosis                                           | 66.7 (2/3)    |

|                           |              |                          |             |                           |             |
|---------------------------|--------------|--------------------------|-------------|---------------------------|-------------|
| Hyperlipidemia            | 75.0 (9/12)  | Epilepsy                 | 66.7 (2/3)  | Difficulty Gaining Weight | 60.0 (6/10) |
| Difficulty Gaining weight | 73.3 (11/15) | Headache                 | 63.6 (7/11) | Dehydration               | 57.1 (4/7)  |
| Behavioral Problems       | 70.0 (7/10)  | Hearing Loss             | 62.5 (5/8)  | Autism Spectrum Disorders | 50.0 (2/4)  |
| Epilepsy                  | 66.7 (8/12)  | Behavioral Problems      | 60.0 (3/5)  | Hyperlipidemia            | 50.0 (2/4)  |
| Heart Rhythm Problems     | 61.5 (8/13)  | Dehydration              | 60.0 (6/10) | Hearing Loss              | 50.0 (1/2)  |
| Hearing Loss              | 60.0 (6/10)  | Ptosis                   | 55.6 (5/9)  | Sleep Apnea               | 50.0 (2/4)  |
| Dehydration               | 58.8 (10/17) | Learning Disability      | 50.0 (2/4)  | Heart Rhythm Problems     | 50.0 (3/6)  |
| Ptosis                    | 58.3 (7/12)  | Difficulty Losing Weight | 50.0 (2/4)  | Headache                  | 42.9 (3/7)  |
| Headache                  | 55.6 (10/18) | Heart Muscle Problems    | 50.0 (2/4)  | Heart Muscle Problems     | 0.0 (0/2)   |
| Sleep Apnea               | 50.0 (4/8)   | Intellectual Disability  | 50.0 (2/4)  | Difficulty Losing Weight  | 0.0 (0/1)   |
| Autism Spectrum Behaviors | 50.0 (2/4)   | Sleep Apnea              | 50.0 (2/4)  | Tinnitus                  |             |
| Difficulty Losing Weight  | 40.0 (2/5)   | Developmental Delay      | 50.0 (1/2)  | Liver Disease             |             |
| Heart Muscle Problems     | 33.3 (2/6)   | Autism Spectrum Disorder |             | Diabetes                  |             |

<sup>1</sup> Respondents coded "likely to participate" responded "Would Participate" or "Likely to participate" in a trial aiming to treat the listed symptom.

<sup>2</sup> **Nonrespondents on individual symptoms and likely to participate (maximum 29 [58.0]% for all Adults and Children are excluded. Lower denominator (N) indicates the total number of respondents.**

**S1D Table. Symptoms most frequently selected by individuals in the top 3<sup>1</sup> that would prompt their participation in a clinical trial, among All patients, Adults and Children.**

| <b>All (N=30)<sup>2</sup></b> |              | <b>Adults (N=15)<sup>2</sup></b> |              | <b>Children (N=15)<sup>2</sup></b> |              |
|-------------------------------|--------------|----------------------------------|--------------|------------------------------------|--------------|
| <b>Symptom</b>                | <b>% (n)</b> | <b>Symptom</b>                   | <b>% (n)</b> | <b>Symptom</b>                     | <b>% (n)</b> |
| Muscle weakness               | 53.6 (15/28) | Muscle weakness                  | 50.0 (7/14)  | Developmental delay                | 78.6 (11/14) |
| Developmental delay           | 39.3 (11/28) | Exercise Intolerance             | 42.9 (6/14)  | Muscle weakness                    | 57.1 (8/14)  |
| Chronic fatigue               | 32.1 (9/28)  | Chronic fatigue                  | 42.9 (6/14)  | Epilepsy                           | 35.7 (5/14)  |
| Epilepsy                      | 25.0 (7/28)  | Gastrointestinal                 | 28.6 (4/14)  | Chronic fatigue                    | 21.4 (3/14)  |
| Exercise Intolerance          | 21.4 (6/28)  | Epilepsy                         | 14.3 (2/14)  | Speech problem                     | 21.4 (3/14)  |
| Gastrointestinal              | 21.4 (6/28)  | Headache                         | 14.3 (2/14)  | Intellectual disability            | 21.4 (3/14)  |
| Intellectual Disability       | 14.3 (4/28)  | Balance problems                 | 14.3 (2/14)  | Kidney disease                     | 14.3 (2/14)  |
| Peripheral neuropathy         | 14.3 (4/28)  | Peripheral neuropathy            | 14.3 (2/14)  | Peripheral neuropathy              | 14.3 (2/14)  |
| Speech problems               | 10.7 (3/28)  | Difficulty Sleeping              | 14.3 (2/14)  | Gastrointestinal                   | 14.3 (2/14)  |
| Headache                      | 7.1 (2/28)   | Stroke                           | 7.1 (1/14)   | Learning disability                | 7.1 (1/14)   |
| Kidney disease                | 7.1 (2/28)   | Intellectual Disability          | 7.1 (1/14)   | Optic nerve problems               | 7.1 (1/14)   |
| Eye muscle problems           | 7.1 (2/28)   | Diabetes                         | 7.1 (1/14)   | Eye muscle problems                | 7.1 (1/14)   |
| Balance problems              | 7.1 (2/28)   | Dysautonomia                     | 7.1 (1/14)   | Exercise intolerance               | 0 (0/14)     |
| Difficulty Sleeping           | 7.1 (2/28)   | Hearing Loss                     | 7.1 (1/14)   | Stroke                             | 0 (0/14)     |
| Stroke                        | 3.6 (1/28)   | Eye Muscle Problems              | 7.1 (1/14)   | Behavior problem                   | 0 (0/14)     |
| Learning disability           | 3.6 (1/28)   | Heart muscle problems            | 7.1 (1/14)   | Mood disorder                      | 0 (0/14)     |
| Diabetes                      | 3.6 (1/28)   | Heart rhythm problems            | 7.1 (1/14)   | Headache                           | 0 (0/14)     |
| Dysautonomia                  | 3.6 (1/28)   | Difficulty Losing Weight         | 7.1 (1/14)   | Autism spectrum                    | 0 (0/14)     |
| Hearing Loss                  | 3.6 (1/28)   | Developmental Delay              | 0 (0/14)     | Dehydration                        | 0 (0/14)     |
| Optic Nerve problems          | 3.6 (1/28)   | Speech Problems                  | 0 (0/14)     | Liver disease                      | 0 (0/14)     |
| Heart muscle problems         | 3.6 (1/28)   | Behavioral problems              | 0 (0/14)     | Diabetes                           | 0 (0/14)     |
| Heart rhythm problems         | 3.6 (1/28)   | Mood Disorder                    | 0 (0/14)     | Cholesterol                        | 0 (0/14)     |
| Difficulty losing weight      | 3.6 (1/28)   | Learning Disability              | 0 (0/14)     | Dysautonomia                       | 0 (0/14)     |

|                           |          |                           |          |                           |          |
|---------------------------|----------|---------------------------|----------|---------------------------|----------|
| Behavior problem          | 0 (0/28) | Autism Spectrum           | 0 (0/14) | Hearing loss              | 0 (0/14) |
| Mood disorder             | 0 (0/28) | Dehydration               | 0 (0/14) | Tinnitus                  | 0 (0/14) |
| Autism spectrum           | 0 (0/28) | Liver disease             | 0 (0/14) | Decrease vision           | 0 (0/14) |
| Dehydration               | 0 (0/28) | Kidney Disease            | 0 (0/14) | Retinal problem           | 0 (0/14) |
| Liver disease             | 0 (0/28) | Cholesterol               | 0 (0/14) | Ptosis                    | 0 (0/14) |
| Cholesterol               | 0 (0/28) | Tinnitus                  | 0 (0/14) | Balance problem           | 0 (0/14) |
| Tinnitus                  | 0 (0/28) | Decreased Vision          | 0 (0/14) | Difficulty sleeping       | 0 (0/14) |
| Decreased vision          | 0 (0/28) | Retinal Problems          | 0 (0/14) | Sleep apnea               | 0 (0/14) |
| Retinal problem           | 0 (0/28) | Optic Nerve Problems      | 0 (0/14) | Heart muscle problems     | 0 (0/14) |
| Ptosis                    | 0 (0/28) | Ptosis                    | 0 (0/14) | Heart rhythm problems     | 0 (0/14) |
| Sleep apnea               | 0 (0/28) | Sleep Apnea               | 0 (0/14) | Difficulty gaining weight | 0 (0/14) |
| Difficulty gaining weight | 0 (0/28) | Difficulty gaining weight | 0 (0/14) | Difficulty losing weight  | 0 (0/14) |

<sup>1</sup> Respondents selected 3 symptoms from 35 symptoms listed

<sup>2</sup> Nonrespondents on individual symptoms (maximum 2 [6.7%] for all patients are excluded. Lower denominator (N) indicates the total number of respondents
