# Supplementary material for: Mitochondrial disease patient motivations and barriers to participate in clinical trials
Source: PubMed Central journal article supplement (PMC5957366; doi:10.1371/journal.pone.0197513), 2018-05-17
Supplement: pone.0197513.s004.pdf [file pone.0197513.s004.pdf]

**S3 Table. Symptom Severity in Adults and Children.**

| Adults (N=169) <sup>1</sup>     |               |          |            |        | Children (N=121) <sup>1</sup>   |               |          |            |        |
|---------------------------------|---------------|----------|------------|--------|---------------------------------|---------------|----------|------------|--------|
| Symptom (N analyzed)            | % Very severe | % Severe | % Moderate | % Mild | Symptom (N analyzed)            | % Very severe | % Severe | % Moderate | % Mild |
| Chronic fatigue (156)           | 10.9          | 39.4     | 35.2       | 9.1    | Muscle weakness (116)           | 23.7          | 26.3     | 33.1       | 15.3   |
| Muscle weakness (154)           | 9.1           | 33.3     | 33.9       | 17.0   | Exercise intolerance (115)      | 27.1          | 27.1     | 33.1       | 10.2   |
| Exercise intolerance (115)      | 27.3          | 37.6     | 21.2       | 6.7    | Chronic fatigue (113)           | 14.4          | 21.2     | 39.0       | 21.2   |
| Balance problems (129)          | 6.8           | 16.1     | 30.3       | 26.5   | Gastrointestinal problems (102) | 24.8          | 17.1     | 27.4       | 18.0   |
| Gastrointestinal problems (121) | 11.04         | 17.2     | 30.7       | 15.3   | Delayed milestones (101)        | 29.1          | 20.5     | 23.1       | 13.7   |
| Sleep problems (116)            | 14.3          | 13.7     | 24.8       | 19.3   | Speech problems (91)            | 30.8          | 11.1     | 16.2       | 19.7   |
| Decreased vision (116)          | 7.5           | 16.2     | 20.5       | 28.0   | Balance problems (90)           | 26.7          | 13.8     | 18.1       | 19.0   |
| Headache (106)                  | 4.9           | 17.3     | 24.1       | 19.1   | Learning disability (85)        | 22.6          | 11.3     | 26.1       | 13.9   |
| Peripheral neuropathy (93)      | 5.7           | 14.6     | 20.3       | 18.4   | Dehydration (79)                | 2.6           | 17.4     | 23.5       | 25.2   |
| Eye muscle problems (92)        | 11.3          | 18.2     | 12.0       | 16.4   | Intellectual disability (76)    | 18.1          | 12.9     | 19.8       | 14.7   |
| Ptosis (90)                     | 15.1          | 15.7     | 8.8        | 17.0   | Sleep problems (75)             | 17.1          | 12.8     | 17.1       | 17.1   |
| Mood disorder (83)              | 1.8           | 3.1      | 16.0       | 30.1   | Headache (70)                   | 6.9           | 9.5      | 21.6       | 22.4   |
| Tinnitus (80)                   | 6.3           | 8.1      | 11.9       | 23.8   | Behavioral problem (66)         | 1.8           | 9.7      | 23.7       | 22.8   |
| Difficulty losing weight (77)   | 10.3          | 10.3     | 17.3       | 11.5   | Dysautonomia (65)               | 17.7          | 8.0      | 21.2       | 10.6   |
| Dehydration (78)                | 3.7           | 8.6      | 16.1       | 19.8   | Decreased vision (64)           | 12.0          | 7.7      | 18.8       | 16.2   |
| Hyperlipidemia (73)             | 5.5           | 6.1      | 17.8       | 15.3   | Difficulty gaining weight (62)  | 5.3           | 10.5     | 21.1       | 17.5   |
| Heart rhythm problems (72)      | 1.8           | 4.3      | 12.9       | 25.2   | Peripheral neuropathy (58)      | 11.6          | 8.0      | 15.2       | 17.0   |
| Hearing loss (68)               | 4.3           | 6.8      | 12.3       | 18.4   | Eye muscle problems (59)        | 8.8           | 7.9      | 20.2       | 14.9   |
| Dysautonomia (59)               | 5.5           | 10.3     | 12.4       | 12.4   | Mood disorder (59)              | 2.6           | 5.2      | 20.0       | 23.5   |
| Speech problems (64)            | 0.6           | 1.8      | 10.3       | 26.1   | Epilepsy or seizures (54)       | 11.0          | 10.2     | 8.5        | 16.1   |
| Delayed milestones (48)         | 2.0           | 4.6      | 11.8       | 13.1   | Ptosis (49)                     | 4.4           | 7.9      | 13.2       | 17.5   |
| Difficulty gaining weight (50)  | 6.2           | 5.6      | 8.0        | 11.1   | Sleep apnea (48)                | 7.9           | 8.8      | 8.8        | 16.7   |
| Sleep apnea (49)                | 3.8           | 6.3      | 12.5       | 8.13   | Autism spectrum (45)            | 4.4           | 10.4     | 11.3       | 13.0   |
| Optic nerve problems (45)       | 2.5           | 5.7      | 8.9        | 11.4   | Heart rhythm problems (37)      | 2.6           | 2.6      | 13.0       | 13.9   |
| Retinal problems (41)           | 1.9           | 3.2      | 9.5        | 11.4   | Optic nerve problems (27)       | 8.8           | 5.3      | 5.3        | 4.4    |

|                              |     |     |     |      |                               |     |     |     |      |
|------------------------------|-----|-----|-----|------|-------------------------------|-----|-----|-----|------|
| Heart muscle problems (35)   | 0.6 | 3.1 | 5.7 | 12.6 | Difficulty losing weight (25) | 1.9 | 4.7 | 6.6 | 10.4 |
| Learning disability (35)     | 1.2 | 1.2 | 9.3 | 9.9  | Heart muscle problems (26)    | 1.8 | 0.9 | 4.4 | 15.8 |
| Diabetes (35)                | 1.2 | 4.9 | 6.8 | 8.6  | Hearing loss (25)             | 6.1 | 3.5 | 0   | 12.2 |
| Epilepsy or seizures (34)    | 0.6 | 0.6 | 4.9 | 14.6 | Hyperlipidemia (19)           | 0   | 3.5 | 3.5 | 9.7  |
| Intellectual disability (32) | 0.6 | 1.2 | 4.9 | 12.9 | Retinal problems (18)         | 2.6 | 2.6 | 5.3 | 5.3  |
| Behavioral problem (29)      | 0   | 1.8 | 5.5 | 10.4 | Liver disease (15)            | 0.9 | 5.1 | 0.9 | 6.0  |
| Stroke (20)                  | 0.6 | 0.6 | 2.5 | 8.6  | Stroke (15)                   | 0.9 | 3.5 | 3.5 | 5.2  |
| Liver disease (19)           | 0.6 | 0.6 | 2.5 | 8.0  | Tinnitus (13)                 | 0.9 | 0.9 | 1.8 | 8.1  |
| Kidney disease (17)          | 0   | 1.2 | 3.1 | 6.2  | Kidney disease (7)            | 0.9 | 1.7 | 1.7 | 1.7  |
| Autism spectrum (15)         | 0   | 0.6 | 2.5 | 6.3  | Diabetes (6)                  | 1.7 | 0.9 | 0.9 | 1.7  |

<sup>1</sup> Nonrespondents on individual symptoms are excluded
