# Supplementary material for: Mitochondrial disease patient motivations and barriers to participate in clinical trials
Source: PubMed Central journal article supplement (PMC5957366; doi:10.1371/journal.pone.0197513), 2018-05-17
Supplement: pone.0197513.s005.pdf [file pone.0197513.s005.pdf]

**S4 Table. Likelihood to participate in clinical trials with differing design and other features in All patients (N=30), Adults (N=15) and Children (N=15).**

| Questions                                                                                                                                   |                                                                                        | % (n)        |              |                  |
|---------------------------------------------------------------------------------------------------------------------------------------------|----------------------------------------------------------------------------------------|--------------|--------------|------------------|
| <b>A. Drug Therapy</b>                                                                                                                      |                                                                                        |              |              |                  |
| <b>i. How likely would you/your child be to participate in a clinical trial if it involves:</b>                                             |                                                                                        |              |              |                  |
|                                                                                                                                             |                                                                                        | All<br>N=30  | Adults N=15  | Children<br>N=15 |
|                                                                                                                                             | Taking a new drug that has never been used before on people                            | 20.0 (6/30)  | 20.0 (3/15)  | 20.0 (3/15)      |
|                                                                                                                                             | Taking a drug that has been used for other purposes, but not for mitochondrial disease | 70.0 (21/30) | 66.7 (10/15) | 73.3 (11/15)     |
|                                                                                                                                             | Taking a vitamin                                                                       | 96.7 (29/30) | 93.3 (14/15) | 100.0 (15/15)    |
|                                                                                                                                             | Taking an antioxidant                                                                  | 90.0 (27/30) | 93.3 (14/15) | 86.7 (13/15)     |
|                                                                                                                                             | Taking a natural supplement that is available at health food stores (ie. GNC)          | 96.7 (29/30) | 93.3 (14/15) | 100.0 (15/15)    |
|                                                                                                                                             | Taking a plant-derived product                                                         | 83.3 (25/30) | 93.3 (14/15) | 73.3 (11/15)     |
|                                                                                                                                             | Taking a food product                                                                  | 93.3 (28/30) | 93.3 (14/15) | 93.3 (14/15)     |
|                                                                                                                                             | Participating in an exercise test                                                      | 72.4 (21/29) | 80.0 (12/15) | 64.3 (9/14)      |
|                                                                                                                                             | Making no changes to your current medication                                           | 66.7 (20/30) | 73.3 (11/15) | 60.0 (9/15)      |
|                                                                                                                                             | Stopping one of your current medications                                               | 50.0 (15/30) | 60.0 (9/15)  | 40.0 (6/15)      |
|                                                                                                                                             | Stopping all of your current medications                                               | 20.0 (6/30)  | 13.3 (2/15)  | 26.7 (4/15)      |
|                                                                                                                                             | Changing your diet                                                                     | 70.0 (21/30) | 60.0 (9/15)  | 80.0 (12/15)     |
| <sup>†</sup> Nonrespondents on individual questions (maximum 1 [3.3%] for All, 0 [0.0%] for Adults and 1 [6.7%] for Children) are excluded. |                                                                                        |              |              |                  |
| <b>ii. How likely would you/your child be to participate in a clinical trial if the drug:</b>                                               |                                                                                        |              |              |                  |
|                                                                                                                                             |                                                                                        | All<br>N=30  | Adults N=15  | Children<br>N=15 |
|                                                                                                                                             | Is a pill                                                                              | 83.3 (25/30) | 86.7 (13/15) | 80.0 (12/15)     |
|                                                                                                                                             | Is an injection                                                                        | 46.7 (14/30) | 40.0 (6/15)  | 53.3 (8/15)      |
|                                                                                                                                             | Has to be taken one time a day                                                         | 93.1 (27/29) | 93.3 (14/15) | 92.9 (13/14)     |
|                                                                                                                                             | Has to be taken two times a day                                                        | 90.0 (27/30) | 86.7 (13/15) | 93.3 (14/15)     |
|                                                                                                                                             | Has to be taken three times a day                                                      | 73.3 (22/30) | 66.7 (10/15) | 80.0 (12/15)     |
|                                                                                                                                             | Has to be taken four or more times a day                                               | 63.3 (19/30) | 53.3 (8/15)  | 73.3 (11/15)     |
|                                                                                                                                             | Can be self administered                                                               | 69.0 (20/29) | 66.7 (10/15) | 71.4 (10/14)     |
|                                                                                                                                             | Has to be given by a nurse                                                             | 43.3 (13/30) | 26.7 (4/15)  | 60.0 (9/15)      |
|                                                                                                                                             | Has to be given at the hospital                                                        | 30.0 (9/30)  | 20.0 (3/15)  | 40.0 (6/15)      |
| <sup>†</sup> Nonrespondents on individual questions (maximum 1 [3.3%] for all, 0 [0.0%] for Adults and 1 [6.7%] for Children) are excluded. |                                                                                        |              |              |                  |
| <b>iii. If you/your child were enrolled in a clinical trial:</b>                                                                            |                                                                                        |              |              |                  |
|                                                                                                                                             |                                                                                        | All<br>N=30  | Adults N=15  | Children<br>N=15 |
| And the same drug became widely available to all people would you...                                                                        | Quit the clinical trial                                                                | 6.7 (2/30)   | 6.7 (1/15)   | 6.7 (1/15)       |
|                                                                                                                                             | Stay in the clinical trial                                                             | 93.3 (28/30) | 93.3 (14/15) | 93.3 (14/15)     |
| And a comparable drug became widely                                                                                                         | Quit the clinical trial                                                                | 3.4 (1/29)   | 6.7 (1/15)   | 0.0 (0/14)       |

|                                                                                                      |                            |              |              |               |
|------------------------------------------------------------------------------------------------------|----------------------------|--------------|--------------|---------------|
| available to all people, would you...                                                                | Stay in the clinical trial | 96.6 (28/29) | 93.3 (14/15) | 100.0 (14/14) |
| And a promising new but completely unrelated drug became widely available to all people would you... | Quit the clinical trial    | 17.2 (5/29)  | 26.7 (4/15)  | 7.1 (1/14)    |
|                                                                                                      | Stay in the clinical trial | 82.8 (24/29) | 73.3 (11/15) | 92.9 (13/14)  |
| And you had progression of your disease symptoms while enrolled, would you...                        | Quit the clinical trial    | 53.3 (16/30) | 40.0 (6/15)  | 66.7 (10/15)  |
|                                                                                                      | Stay in the clinical trial | 46.7 (14/30) | 60.0 (9/15)  | 33.3 (5/15)   |

<sup>1</sup>Nonrespondents on individual questions (maximum 1 [3.3%] for All, 0 [0.0%] for Adults and 1 [6.7%] for Children) are excluded.

### B. Goal of the Study

#### i. How likely would you/your child be to participate in a clinical trial if it is supposed to help with:

|                                                                                         | All<br>N=30  | Adults<br>N=15 | Children<br>N=15 |
|-----------------------------------------------------------------------------------------|--------------|----------------|------------------|
| Only one of the symptoms that you/your child experiences from the mitochondrial disease | 79.3 (23/29) | 66.7 (10/15)   | 92.9 (13/14)     |
| Multiple symptoms that you/your child experience but not all of the symptoms            | 93.1 (27/29) | 86.7 (13/15)   | 100.0 (14/14)    |
| All of the symptoms you/your child experience from the mitochondrial disease            | 93.1 (27/29) | 86.7 (13/15)   | 100.0 (14/14)    |

<sup>1</sup>Nonrespondents on individual questions (maximum 1 [3.3%] for all, 0 [0.0%] for Adults and 1 [6.7%] for Children) are excluded.

#### ii. How likely would you/your child be to participate in a clinical trial if it is:

|                                       | All<br>N=30  | Adults<br>N=15 | Children<br>N=15 |
|---------------------------------------|--------------|----------------|------------------|
| One day long                          | 89.7 (26/29) | 86.7 (13/15)   | 92.9 (13/14)     |
| One week long                         | 82.8 (24/29) | 73.3 (11/15)   | 92.9 (13/14)     |
| One month long                        | 85.7 (24/28) | 78.6 (11/14)   | 92.9 (13/14)     |
| Several months (3-4 months) in length | 78.6 (22/28) | 78.6 (11/14)   | 78.6 (11/14)     |
| One year in length                    | 60.7 (17/28) | 57.1 (8/14)    | 64.3 (9/14)      |
| More than one year in length          | 53.6 (15/28) | 50.0 (7/14)    | 57.1 (8/14)      |

<sup>1</sup>Nonrespondents on individual questions (maximum 2 [6.7%] for all, 1 [6.7%] for Adults and 1 [6.7%] for Children) are excluded.

### C. Trial Design

#### i. How likely would you/your child be to participate in a clinical trial if it is:

|                                                                                                           | All<br>N=30  | Adults<br>N=15 | Children<br>N=15 |
|-----------------------------------------------------------------------------------------------------------|--------------|----------------|------------------|
| Half of the people in the study get a placebo pill (inactive drug) and the other half get the active drug | 37.0 (10/27) | 46.2 (6/13)    | 28.6 (4/14)      |
| Half of the people in the study get the active drug and the other half get a placebo pill (inactive drug) | 37.0 (10/27) | 46.2 (6/13)    | 28.6 (4/14)      |
| You sequentially take several different drugs or placebos each for a defined time period in an            | 48.1 (13/27) | 61.5 (8/13)    | 35.7 (5/14)      |

|                                                                                                                     |              |              |              |
|---------------------------------------------------------------------------------------------------------------------|--------------|--------------|--------------|
| unpredictable order (ie. Take drug A for one month, then take drug B for one month, then take drug C for one month) |              |              |              |
| There is a chance of only getting the placebo (inactive drug)                                                       | 33.3 (9/27)  | 38.5 (5/13)  | 28.6 (4/14)  |
| Everyone gets the drug and placebo at some point                                                                    | 66.7 (18/27) | 84.6 (11/13) | 50.0 (7/14)  |
| Everyone gets only the drug at some point                                                                           | 77.8 (21/27) | 84.6 (11/13) | 71.4 (10/14) |
| Neither you nor the study team know whether you are receiving the drug or placebo                                   | 29.6 (8/27)  | 30.8 (4/13)  | 28.6 (4/14)  |
| Only you do not know which treatment you are receiving                                                              | 33.3 (9/27)  | 38.5 (5/13)  | 28.6 (4/14)  |
| Only your doctor does not know which treatment you are receiving                                                    | 18.5 (5/27)  | 15.4 (2/13)  | 21.4 (3/14)  |
| The study team selects whether you receive the drug or placebo                                                      | 33.3 (9/27)  | 30.8 (4/13)  | 35.7 (5/14)  |
| You select whether you receive the drug or placebo                                                                  | 51.9 (14/27) | 61.5 (8/13)  | 42.9 (6/14)  |
| There is random assignment of who receives the drug or placebo                                                      | 37.0 (10/27) | 38.5 (5/13)  | 35.7 (5/14)  |
| You could be randomized to either take the new treatment or continue your regular mitochondrial cocktail            | 44.4 (12/27) | 46.2 (6/13)  | 42.9 (6/14)  |
| You are already enrolled in another clinical trial at the same time                                                 | 25.9 (7/27)  | 30.8 (4/13)  | 21.4 (3/14)  |
| You are guaranteed the drug after the study ends                                                                    | 55.6 (15/27) | 61.5 (8/13)  | 50.0 (7/14)  |

<sup>†</sup>Nonrespondents on individual questions (maximum 3 [30.0%] for all, 2 [13.3%] for Adults and 1 [6.7%] for Children) are excluded.

| <b>ii. How likely would you/your child be to participate if the clinical trial involves:</b> |              |                |                  |
|----------------------------------------------------------------------------------------------|--------------|----------------|------------------|
|                                                                                              | All<br>N=30  | Adults<br>N=15 | Children<br>N=15 |
| Daily blood tests                                                                            | 22.2 (6/27)  | 23.1 (3/13)    | 21.4 (3/14)      |
| Weekly blood tests                                                                           | 55.6 (15/27) | 53.8 (7/13)    | 57.1 (8/14)      |
| Monthly blood tests                                                                          | 81.5 (22/27) | 84.6 (11/13)   | 78.6 (11/14)     |
| 2 blood tests (one at the beginning and one at the end)                                      | 76.9 (20/26) | 75.0 (9/12)    | 78.6 (11/14)     |
| Urine tests                                                                                  | 80.8 (21/26) | 76.9 (10/13)   | 84.6 (11/13)     |
| Stool tests                                                                                  | 70.4 (19/27) | 53.8 (7/13)    | 85.7 (12/14)     |
| An electrocardiogram (ECG)                                                                   | 81.5 (22/27) | 76.9 (10/13)   | 85.7 (12/14)     |
| And echocardiogram (heart ultrasound)                                                        | 85.2 (23/27) | 84.6 (11/13)   | 85.7 (12/14)     |
| Heart rate monitoring                                                                        | 77.8 (21/27) | 76.9 (10/13)   | 78.6 (11/14)     |
| Exercise tests                                                                               | 66.7 (18/27) | 69.2 (9/13)    | 64.3 (9/14)      |
| An X-ray                                                                                     | 77.8 (21/27) | 84.6 (11/13)   | 71.4 (10/14)     |
| An MRI                                                                                       | 55.6 (15/27) | 69.2 (9/13)    | 42.9 (6/14)      |
| An ultrasound                                                                                | 81.5 (22/27) | 84.6 (11/13)   | 78.6 (11/14)     |
| Having an IV placed                                                                          | 48.1 (13/27) | 30.8 (4/13)    | 64.3 (9/14)      |
| Visits to the research site or a hospital                                                    | 70.4 (19/27) | 69.2 (9/13)    | 71.4 (10/14)     |
| Overnight hospital visits                                                                    | 55.6 (15/27) | 46.2 (6/13)    | 64.3 (9/14)      |
| No travelling at all                                                                         | 81.5 (22/27) | 76.9 (10/13)   | 85.7 (12/14)     |
| Travel within a city                                                                         | 88.9 (24/27) | 92.3 (12/13)   | 85.7 (12/14)     |
| Traveling to another state                                                                   | 55.6 (15/27) | 38.5 (5/13)    | 71.4 (10/14)     |
| International travel to another country                                                      | 25.9 (7/27)  | 15.4 (2/13)    | 35.7 (5/14)      |

|                                                               |              |             |              |
|---------------------------------------------------------------|--------------|-------------|--------------|
| Traveling while you are experiencing symptoms                 | 40.7 (11/27) | 46.2 (6/13) | 35.7 (5/14)  |
| Traveling when you are feeling good enough to travel          | 63.0 (17/27) | 53.8 (7/13) | 71.4 (10/14) |
| No payment or monetary reimbursement                          | 48.1 (13/27) | 38.5 (5/13) | 57.1 (8/14)  |
| A cash incentive to participate                               | 55.6 (15/27) | 61.5 (8/13) | 50.0 (7/14)  |
| A gift card incentive to participate                          | 55.6 (15/27) | 61.5 (8/13) | 50.0 (7/14)  |
| You having to make a payment in order to be part of the trial | 18.5 (5/27)  | 7.7 (1/13)  | 28.6 (4/14)  |

<sup>1</sup>Nonrespondents on individual questions (maximum 4 [13.3%] for all, 3 [20.0%] for Adults and 2 [13.3%] for Children) are excluded.

**iii. How likely would you/your child be to participate if the clinical trial is:**

|                                                                                 | All<br>N=30  | Adults<br>N=15 | Children<br>N=15 |
|---------------------------------------------------------------------------------|--------------|----------------|------------------|
| Conducted by your local doctor                                                  | 85.2 (23/27) | 92.3 (12/13)   | 78.6 (11/14)     |
| Conducted by an academic hospital                                               | 88.9 (24/27) | 84.6 (11/13)   | 92.9 (13/14)     |
| Conducted by a pharmaceutical company                                           | 40.7 (11/27) | 30.8 (4/13)    | 50.0 (7/14)      |
| Conducted by a patient advocacy group or support group                          | 69.2 (18/26) | 53.8 (7/13)    | 84.6 (11/13)     |
| A single-site trial                                                             | 66.7 (18/27) | 61.5 (8/13)    | 71.4 (10/14)     |
| A multi-site trial (different locations are working together on the same trial) | 66.7 (18/27) | 53.8 (7/13)    | 78.6 (11/14)     |
| In phase 1 (screening for safety)                                               | 51.9 (14/27) | 53.8 (7/13)    | 50.0 (7/14)      |
| In phase 2 (establishing the efficacy of the drug, usually against a placebo)   | 59.3 (16/27) | 53.8 (7/13)    | 64.3 (9/14)      |
| In phase 3 (final confirmation of safety and efficacy)                          | 70.4 (19/27) | 61.5 (8/13)    | 78.6 (11/14)     |

<sup>1</sup>Nonrespondents on individual questions (maximum 4 [13.3%] for all, 2 [13.3%] for Adults and 2 [13.3%] for Children) are excluded.

**D. Other Features**

**i. Would the following factor(s) influence your decision to participate in a clinical trial:**

|                                                                                  | All<br>N=30  | Adults<br>N=15 | Children<br>N=15 |
|----------------------------------------------------------------------------------|--------------|----------------|------------------|
| Potential to benefit yourself                                                    | 84.0 (21/25) | 100.0 (12/12)  | 69.2 (9/13)      |
| Potential to benefit your family                                                 | 84.0 (21/25) | 91.7 (11/12)   | 76.9 (10/13)     |
| Potential to benefit other affected individuals                                  | 80.0 (20/25) | 83.3 (10/12)   | 76.9 (10/13)     |
| Potential to aid in science and scientific advancement                           | 68.0 (17/25) | 75.0 (9/12)    | 61.5 (8/13)      |
| No other treatment options exist                                                 | 84.0 (21/25) | 91.7 (11/12)   | 76.9 (10/13)     |
| No other affordable treatment options                                            | 84.0 (21/25) | 83.3 (10/12)   | 84.6 (11/13)     |
| The same treatment is not available clinically                                   | 80.0 (20/25) | 75.0 (9/12)    | 84.6 (11/13)     |
| The same treatment is available outside of the trial but too expensive to access | 68.0 (17/25) | 58.3 (7/12)    | 76.9 (10/13)     |
| Access to free healthcare                                                        | 44.0 (11/25) | 41.7 (5/12)    | 46.2 (6/13)      |
| Apparent risks will outweigh the benefit                                         | 0.0 (0/23)   | 0.0 (0/12)     | 0.0 (0/11)       |
| Apparent benefits will outweigh the risks                                        | 84.0 (21/25) | 83.3 (10/12)   | 84.6 (11/13)     |
| No prospective self benefit                                                      | 4.2 (1/24)   | 8.3 (1/12)     | 0.0 (0/12)       |
| Possibility to cure your disease                                                 | 96.0 (24/25) | 100 (12/12)    | 92.3 (12/13)     |
| Possibility to prevent progression of your disease                               | 96.0 (24/25) | 100 (12/12)    | 92.3 (12/13)     |

|                                                                                                                                                |              |                |                  |
|------------------------------------------------------------------------------------------------------------------------------------------------|--------------|----------------|------------------|
| Possibility to treat some symptoms of your disease                                                                                             | 96.0 (24/25) | 100 (12/12)    | 92.3 (12/13)     |
| Potential of worsening your disease                                                                                                            | 8.3 (2/24)   | 8.3 (1/12)     | 8.3 (1/12)       |
| Potential of experiencing transient major side effects                                                                                         | 8.3 (2/24)   | 0.0 (0/12)     | 16.7 (2/12)      |
| Potential of experiencing transient minor side effects                                                                                         | 36.0 (9/25)  | 33.3 (4/12)    | 38.5 (5/13)      |
| Potential for death from study participation                                                                                                   | 0.0 (0/24)   | 0.0 (0/12)     | 0.0 (0/12)       |
| Potential for closer monitoring of your health                                                                                                 | 68.0 (17/25) | 66.7 (8/12)    | 69.2 (9/13)      |
| Potential out-of-pocket expenses                                                                                                               | 8.3 (2/24)   | 0.0 (0/12)     | 16.7 (2/12)      |
| Desire to participate in any clinical trial                                                                                                    | 27.3 (6/22)  | 27.3 (3/11)    | 27.3 (3/11)      |
| Desire to avoid participation in any clinical trial                                                                                            | 0.0 (0/22)   | 0.0 (0/11)     | 0.0 (0/11)       |
| <sup>1</sup> Nonrespondents on individual questions (maximum 8 [26.7%] for all, 4 [26.7%] for Adults and 4 [26.7%] for Children) are excluded. |              |                |                  |
| <b>ii. How likely would you/your child be to participate in a clinical trial if you learned about the trial through:</b>                       |              |                |                  |
|                                                                                                                                                | All<br>N=30  | Adults<br>N=15 | Children<br>N=15 |
| Your primary care physician                                                                                                                    | 76.0 (19/25) | 66.7 (8/12)    | 84.6 (11/13)     |
| One of your medical specialists                                                                                                                | 88.0 (22/25) | 83.3 (10/12)   | 92.3 (12/13)     |
| A healthy family member                                                                                                                        | 48.0 (12/25) | 41.7 (5/12)    | 53.8 (7/13)      |
| A family member that was already in the clinical trial                                                                                         | 64.0 (16/25) | 41.7 (5/12)    | 84.6 (11/13)     |
| A healthy friend                                                                                                                               | 40.0 (10/25) | 33.3 (4/12)    | 46.2 (6/13)      |
| A friend who also has a mitochondrial disease                                                                                                  | 80.0 (20/25) | 75.0 (9/12)    | 84.6 (11/13)     |
| Another participant that was already in the clinical trial                                                                                     | 84.0 (21/25) | 75.0 (9/12)    | 92.3 (12/13)     |
| A support group or patient advocacy group                                                                                                      | 76.0 (19/25) | 66.7 (8/12)    | 84.6 (11/13)     |
| The NIH clinical trials website                                                                                                                | 75.0 (18/24) | 63.6 (7/11)    | 84.6 (11/13)     |
| A newspaper article                                                                                                                            | 40.0 (10/25) | 25.0 (3/12)    | 53.8 (7/13)      |
| A social media website                                                                                                                         | 28.0 (7/25)  | 16.7 (2/12)    | 38.5 (5/13)      |
| The internet                                                                                                                                   | 28.0 (7/25)  | 16.7 (2/12)    | 38.5 (5/13)      |
| The television                                                                                                                                 | 28.0 (7/25)  | 16.7 (2/12)    | 38.5 (5/13)      |
| A flyer                                                                                                                                        | 28.0 (7/25)  | 16.7 (2/12)    | 38.5 (5/13)      |
| A letter mailed to your home                                                                                                                   | 56.0 (14/25) | 50.0 (6/12)    | 61.5 (8/13)      |
| A phone call from the study team                                                                                                               | 80.0 (20/25) | 75.0 (9/12)    | 84.6 (11/13)     |
| An email from the study team                                                                                                                   | 68.0 (17/25) | 66.7 (8/12)    | 69.2 (9/13)      |
| An email from the North American Mitochondrial Disease Consortium (NAMDC)                                                                      | 80.0 (20/25) | 66.7 (8/12)    | 92.3 (12/13)     |
| <sup>1</sup> Nonrespondents on individual questions (maximum 6 [20.0%] for all, 4 [26.7%] for Adults and 2 [13.3%] for Children) are excluded. |              |                |                  |
| <b>iii. How likely are you/your child to participate in a clinical trial knowing that:</b>                                                     |              |                |                  |
|                                                                                                                                                | All<br>N=30  | Adults<br>N=15 | Children<br>N=15 |
| Your genetic information is being analyzed                                                                                                     | 80.0 (20/25) | 66.7 (8/12)    | 92.3 (12/13)     |
| Your genetic information cannot affect your medical insurance policy                                                                           | 92.0 (23/25) | 83.3 (10/12)   | 100.0 (13/13)    |
| Your genetic information can affect your ability to purchase a life insurance policy                                                           | 28.0 (7/25)  | 8.3 (1/12)     | 46.2 (6/13)      |

|                                                                                                                                   |             |            |             |
|-----------------------------------------------------------------------------------------------------------------------------------|-------------|------------|-------------|
| Your genetic information can affect your ability to qualify for disability insurance                                              | 28.0 (7/25) | 8.3 (1/12) | 46.2 (6/13) |
| Nonrespondents on individual questions (maximum 5 [16.7%] for All, 3 [10.0%] for Adults and 2 [13.3%] for Children) are excluded. |             |            |             |
