# Supplementary material for: Mitochondrial disease patient motivations and barriers to participate in clinical trials
Source: PubMed Central journal article supplement (PMC5957366; doi:10.1371/journal.pone.0197513), 2018-05-17
Supplement: pone.0197513.s006.pdf [file pone.0197513.s006.pdf]

**S5 Table. RDCRN Survey (n=290) respondents likely to participate in clinical trials with differing design and other features.**

| Questions                                                                                                                                     |                                                                                        | % (n)          |                 |                   |
|-----------------------------------------------------------------------------------------------------------------------------------------------|----------------------------------------------------------------------------------------|----------------|-----------------|-------------------|
| <b>A. Drug Therapy</b>                                                                                                                        |                                                                                        |                |                 |                   |
| <b>i. How likely would you/your child be to participate in a clinical trial if it involves:</b>                                               |                                                                                        |                |                 |                   |
|                                                                                                                                               |                                                                                        | All<br>N=290   | Adults<br>N=169 | Children<br>N=121 |
|                                                                                                                                               | Taking a new drug that has never been used before on people                            | 47.3 (130/275) | 52.5 (84/160)   | 40.0 (46/115)     |
|                                                                                                                                               | Taking a drug that has been used for other purposes, but not for mitochondrial disease | 73.8 (203/275) | 76.1 (121/159)  | 70.7 (82/116)     |
|                                                                                                                                               | Taking a vitamin                                                                       | 95.6 (263/275) | 98.1 (156/159)  | 92.2 (107/116)    |
|                                                                                                                                               | Taking an antioxidant                                                                  | 92.8 (256/276) | 96.3 (154/160)  | 87.9 (102/116)    |
|                                                                                                                                               | Taking a natural supplement that is available at health food stores (ie. GNC)          | 91.3 (252/276) | 96.3 (154/160)  | 84.5 (98/116)     |
|                                                                                                                                               | Taking a plant-derived product                                                         | 87.3 (240/275) | 91.9 (147/160)  | 80.9 (93/115)     |
|                                                                                                                                               | Taking a food product                                                                  | 88.8 (245/276) | 93.8 (150/160)  | 81.9 (95/116)     |
|                                                                                                                                               | Participating in an exercise test                                                      | 80.7 (221/274) | 85.5 (136/159)  | 73.9 (85/115)     |
|                                                                                                                                               | Making no changes to your current medication                                           | 73.2 (199/272) | 74.5 (117/157)  | 71.3 (82/115)     |
|                                                                                                                                               | Stopping one of your current medications                                               | 48.7 (132/271) | 56.1 (88/157)   | 38.6 (44/114)     |
|                                                                                                                                               | Stopping all of your current medications                                               | 26.8 (73/272)  | 33.5 (53/158)   | 17.5 (20/114)     |
|                                                                                                                                               | Changing your diet                                                                     | 77.5 (213/275) | 86.8 (138/159)  | 64.7 (75/116)     |
| <sup>1</sup> Nonrespondents on individual questions (maximum 19 [6.6%] for all, 12 [7.1%] for Adults and 7 [5.8%] for Children) are excluded. |                                                                                        |                |                 |                   |
| <b>ii. How likely would you/your child be to participate in a clinical trial if the drug:</b>                                                 |                                                                                        |                |                 |                   |
|                                                                                                                                               |                                                                                        | All<br>N=290   | Adults<br>N=169 | Children<br>N=121 |
|                                                                                                                                               | Is a pill                                                                              | 82.6 (228/276) | 89.4 (143/160)  | 73.3 (85/116)     |
|                                                                                                                                               | Is an injection                                                                        | 65.8 (181/275) | 74.8 (119/159)  | 53.4 (62/116)     |
|                                                                                                                                               | Has to be taken one time a day                                                         | 91.9 (250/272) | 92.4 (145/157)  | 91.3 (105/115)    |
|                                                                                                                                               | Has to be taken two times a day                                                        | 88.4 (243/275) | 88.7 (141/159)  | 87.9 (102/116)    |
|                                                                                                                                               | Has to be taken three times a day                                                      | 78.2 (215/275) | 76.1 (121/159)  | 81.0 (94/116)     |
|                                                                                                                                               | Has to be taken four or more times a day                                               | 66.1 (181/274) | 66.5 (105/158)  | 65.5 (76/116)     |
|                                                                                                                                               | Can be self administered                                                               | 87.5 (239/273) | 89.2 (140/157)  | 85.3 (99/116)     |
|                                                                                                                                               | Has to be given by a nurse                                                             | 57.2 (158/276) | 57.5 (92/160)   | 56.9 (66/116)     |
|                                                                                                                                               | Has to be given at the hospital                                                        | 50.0 (135/270) | 51.0 (79/155)   | 48.7 (56/115)     |
| <sup>1</sup> Nonrespondents on individual questions (maximum 20 [6.9%] for all, 14 [8.3%] for Adults and 6 [5.0%] for Children) are excluded. |                                                                                        |                |                 |                   |
| <b>iii. If you/your child were enrolled in a clinical trial:</b>                                                                              |                                                                                        |                |                 |                   |
|                                                                                                                                               |                                                                                        | All<br>N=290   | Adults<br>N=169 | Children<br>N=121 |
| And the same drug became widely available to all people would you...                                                                          | Quit the clinical trial                                                                | 4.8 (13/271)   | 3.8 (6/157)     | 6.1 (7/114)       |
|                                                                                                                                               | Stay in the clinical trial                                                             | 95.2 (258/271) | 96.2 (151/157)  | 93.9 (107/114)    |
| And a comparable drug became widely                                                                                                           | Quit the clinical trial                                                                | 4.1 (11/269)   | 4.5 (7/156)     | 3.5 (4/113)       |

|                                                                                                      |                            |                |                |                |
|------------------------------------------------------------------------------------------------------|----------------------------|----------------|----------------|----------------|
| available to all people, would you...                                                                | Stay in the clinical trial | 95.9 (258/269) | 95.5 (149/156) | 96.5 (109/113) |
| And a promising new but completely unrelated drug became widely available to all people would you... | Quit the clinical trial    | 8.4 (22/263)   | 9.9 (15/152)   | 6.3 (7/111)    |
|                                                                                                      | Stay in the clinical trial | 91.6 (241/263) | 90.1 (137/152) | 93.7 (104/111) |
| And you had progression of your disease symptoms while enrolled, would you...                        | Quit the clinical trial    | 49.6 (133/268) | 46.8 (73/156)  | 53.6 (60/112)  |
|                                                                                                      | Stay in the clinical trial | 50.4 (135/268) | 53.2 (83/156)  | 46.4 (52/112)  |

<sup>1</sup>Nonrespondents on individual questions (maximum 27 [9.3%] for all, 17 [10.1%] for Adults and 10 [8.3%] for Children) are excluded.

### B. Goal of the Study

#### i. How likely would you/your child be to participate in a clinical trial if it is supposed to help with:

|                                                                                         | All<br>N=290   | Adults<br>N=169 | Children<br>N=121 |
|-----------------------------------------------------------------------------------------|----------------|-----------------|-------------------|
| Only one of the symptoms that you/your child experiences from the mitochondrial disease | 86.2 (232/269) | 88.4 (137/155)  | 83.3 (95/114)     |
| Multiple symptoms that you/your child experience but not all of the symptoms            | 94.4 (253/268) | 97.4 (150/154)  | 90.4 (103/114)    |
| All of the symptoms you/your child experience from the mitochondrial disease            | 95.9 (257/268) | 98.1 (151/154)  | 93.0 (106/114)    |

<sup>1</sup>Nonrespondents on individual questions (maximum 22 [7.6%] for all, 15 [8.9%] for Adults and 7 [5.8%] for Children) are excluded.

#### ii. How likely would you/your child be to participate in a clinical trial if it is...

|                                       | All<br>N=290   | Adults<br>N=169 | Children<br>N=121 |
|---------------------------------------|----------------|-----------------|-------------------|
| One day long                          | 85.7 (227/265) | 85.8 (133/155)  | 85.5 (94/110)     |
| One week long                         | 86.5 (230/266) | 85.8 (133/155)  | 87.4 (97/111)     |
| One month long                        | 85.0 (226/266) | 85.2 (132/155)  | 84.7 (94/111)     |
| Several months (3-4 months) in length | 83.2 (218/262) | 84.9 (129/152)  | 80.9 (89/110)     |
| One year in length                    | 75.4 (199/264) | 75.2 (115/153)  | 75.7 (84/111)     |
| More than one year in length          | 68.1 (179/263) | 66.4 (101/152)  | 70.3 (78/111)     |

<sup>1</sup>Nonrespondents on individual questions (maximum 28 [9.7%] for all, 17 [10.1%] for Adults and 11 [9.1%] for Children) are excluded.

### C. Trial Design

#### i. How likely would you/your child be to participate in a clinical trial if it is..

|                                                                                                           | All<br>N=290   | Adults<br>N=169 | Children<br>N=121 |
|-----------------------------------------------------------------------------------------------------------|----------------|-----------------|-------------------|
| Half of the people in the study get a placebo pill (inactive drug) and the other half get the active drug | 58.0 (153/264) | 59.9 (91/152)   | 55.4 (62/112)     |
| Half of the people in the study get the active drug and the other half get a placebo pill (inactive drug) | 57.0 (150/263) | 59.2 (90/152)   | 54.1 (60/111)     |

|                                                                                                                                                                                                                    |                |                |               |
|--------------------------------------------------------------------------------------------------------------------------------------------------------------------------------------------------------------------|----------------|----------------|---------------|
| You sequentially take several different drugs or placebos each for a defined time period in an unpredictable order (ie. Take drug A for one month, then take drug B for one month, then take drug C for one month) | 58.7 (155/264) | 61.8 (94/152)  | 54.5 (61/112) |
| There is a chance of only getting the placebo (inactive drug)                                                                                                                                                      | 46.6 (122/262) | 49.0 (74/151)  | 43.2 (48/111) |
| Everyone gets the drug and placebo at some point                                                                                                                                                                   | 70.5 (184/261) | 70.2 (106/151) | 70.9 (78/110) |
| Everyone gets only the drug at some point                                                                                                                                                                          | 82.0 (214/261) | 83.2 (124/149) | 80.4 (90/112) |
| Neither you nor the study team know whether you are receiving the drug or placebo                                                                                                                                  | 52.3 (136/260) | 53.7 (80/149)  | 50.5 (56/111) |
| Only you do not know which treatment you are receiving                                                                                                                                                             | 53.8 (141/262) | 54.7 (82/150)  | 52.7 (59/112) |
| Only your doctor does not know which treatment you are receiving                                                                                                                                                   | 51.1 (134/262) | 53.0 (80/151)  | 48.6 (54/111) |
| The study team selects whether you receive the drug or placebo                                                                                                                                                     | 51.9 (136/262) | 53.3 (80/150)  | 50.0 (56/112) |
| You select whether you receive the drug or placebo                                                                                                                                                                 | 64.8 (169/261) | 67.8 (101/149) | 60.7 (68/112) |
| There is random assignment of who receives the drug or placebo                                                                                                                                                     | 60.5 (158/261) | 61.3 (92/150)  | 59.5 (66/111) |
| You could be randomized to either take the new treatment or continue your regular mitochondrial cocktail                                                                                                           | 66.3 (173/261) | 65.1 (97/149)  | 67.9 (76/112) |
| You are already enrolled in another clinical trial at the same time                                                                                                                                                | 38.5 (100/260) | 36.2 (54/149)  | 41.4 (46/111) |
| You are guaranteed the drug after the study ends                                                                                                                                                                   | 80.6 (208/258) | 81.6 (120/147) | 79.3 (88/111) |

<sup>1</sup>Nonrespondents on individual questions (maximum 32 [11.0%] for all, 22 [13.0%] for Adults and 11 [9.1%] for Children) are excluded.

**ii. How likely would you/your child be to participate if the clinical trial involves...**

|                                                         | All<br>N=290   | Adults<br>N=169 | Children<br>N=121 |
|---------------------------------------------------------|----------------|-----------------|-------------------|
| Daily blood tests                                       | 35.6 (93/261)  | 40.1 (61/152)   | 29.4 (32/109)     |
| Weekly blood tests                                      | 63.4 (166/262) | 69.1 (105/152)  | 55.5 (61/110)     |
| Monthly blood tests                                     | 81.2 (211/260) | 86.1 (130/151)  | 74.3 (81/109)     |
| 2 blood tests (one at the beginning and one at the end) | 85.6 (225/263) | 86.2 (131/152)  | 84.7 (94/111)     |
| Urine tests                                             | 84.8 (223/263) | 86.8 (132/152)  | 82.0 (91/111)     |
| Stool tests                                             | 74.8 (196/262) | 72.4 (110/152)  | 78.2 (86/110)     |
| An electrocardiogram (ECG)                              | 84.8 (223/263) | 85.5 (130/152)  | 83.8 (93/111)     |
| And echocardiogram (heart ultrasound)                   | 85.2 (224/263) | 86.2 (131/152)  | 83.8 (93/111)     |
| Heart rate monitoring                                   | 84.3 (220/261) | 84.8 (128/151)  | 83.6 (92/110)     |
| Exercise tests                                          | 78.6 (206/262) | 82.2 (125/152)  | 73.6 (81/110)     |
| An X-ray                                                | 78.9 (206/261) | 79.5 (120/151)  | 78.2 (86/110)     |
| An MRI                                                  | 76.3 (200/262) | 77.6 (118/152)  | 74.5 (82/110)     |
| An ultrasound                                           | 83.6 (219/262) | 85.5 (130/152)  | 80.9 (89/110)     |
| Having an IV placed                                     | 64.6 (166/257) | 68.5 (102/149)  | 59.3 (64/108)     |
| Visits to the research site or a hospital               | 72.1 (189/262) | 74.3 (113/152)  | 69.1 (76/110)     |
| Overnight hospital visits                               | 66.7 (174/261) | 70.2 (106/151)  | 61.8 (68/110)     |
| No travelling at all                                    | 82.1 (215/262) | 79.6 (121/152)  | 85.5 (94/110)     |

|                                                               |                |                |               |
|---------------------------------------------------------------|----------------|----------------|---------------|
| Traveling within same city or town                            | 83.5 (218/261) | 80.8 (122/151) | 87.3 (96/110) |
| Traveling to another state                                    | 60.9 (156/256) | 60.4 (90/149)  | 61.7 (66/107) |
| International travel to another country                       | 39.7 (104/262) | 38.8 (59/152)  | 40.9 (45/110) |
| Traveling while you are experiencing symptoms                 | 55.2 (143/259) | 59.2 (90/152)  | 49.5 (53/107) |
| Traveling when you are feeling good enough to travel          | 70.0 (182/260) | 72.7 (109/150) | 66.4 (73/110) |
| No payment or monetary reimbursement                          | 60.9 (159/261) | 61.2 (93/152)  | 60.6 (66/109) |
| A cash incentive to participate                               | 69.7 (182/261) | 72.4 (110/152) | 66.1 (72/109) |
| A gift card incentive to participate                          | 67.4 (174/258) | 70.0 (105/150) | 63.9 (69/108) |
| You having to make a payment in order to be part of the trial | 18.8 (49/260)  | 16.7 (25/150)  | 21.8 (24/110) |

<sup>1</sup>Nonrespondents on individual questions (maximum 33 [11.4%] for all, 20 [11.8%] for Adults and 14 [11.6%] for Children) are excluded.

**iii. How likely would you/your child be to participate if the clinical trial is:**

|                                                                                 | All<br>N=290   | Adults<br>N=169 | Children<br>N=121 |
|---------------------------------------------------------------------------------|----------------|-----------------|-------------------|
| Conducted by your local doctor                                                  | 87.8 (230/262) | 89.5 (136/152)  | 85.5 (94/110)     |
| Conducted by an academic hospital                                               | 86.2 (225/261) | 88.7 (134/151)  | 82.7 (91/110)     |
| Conducted by a pharmaceutical company                                           | 64.2 (167/260) | 65.6 (99/151)   | 62.4 (68/109)     |
| Conducted by a patient advocacy group or support group                          | 70.3 (182/259) | 71.8 (107/149)  | 68.2 (75/110)     |
| A single-site trial                                                             | 70.7 (181/256) | 71 (105/147)    | 69.7 (76/109)     |
| A multi-site trial (different locations are working together on the same trial) | 74.2 (193/260) | 76.5 (114/149)  | 71.2 (79/111)     |
| In phase 1 (screening for safety)                                               | 58.9 (152/258) | 64.9 (96/148)   | 50.9 (56/110)     |
| In phase 2 (establishing the efficacy of the drug, usually against a placebo)   | 74.7 (195/261) | 75.3 (113/150)  | 73.9 (82/111)     |
| In phase 3 (final confirmation of safety and efficacy)                          | 81.2 (212/261) | 80.7 (121/150)  | 82.0 (91/111)     |

<sup>1</sup>Nonrespondents on individual questions (maximum 34 [11.7%] for all, 22 [13.0%] for Adults and 12 [9.9%] for Children) are excluded.

**D. Other Features**

**i. Would the following factor(s) influence your decision to participate in a clinical trial:**

|                                                                                  | All<br>N=290   | Adults<br>N=169 | Children<br>N=121 |
|----------------------------------------------------------------------------------|----------------|-----------------|-------------------|
| Potential to benefit yourself                                                    | 83.3 (219/263) | 89.5 (137/153)  | 74.5 (82/110)     |
| Potential to benefit your family                                                 | 83.8 (217/259) | 85.4 (129/151)  | 81.5 (88/108)     |
| Potential to benefit other affected individuals                                  | 83.6 (219/262) | 87.4 (132/151)  | 78.4 (87/111)     |
| Potential to aid in science                                                      | 74.2 (193/260) | 78.8 (119/151)  | 67.9 (74/109)     |
| No other treatment options exist                                                 | 78.8 (205/260) | 75.5 (114/151)  | 83.5 (91/109)     |
| No other affordable treatment options                                            | 75.4 (196/260) | 72.2 (109/151)  | 79.8 (87/109)     |
| The same treatment is not available clinically                                   | 74.1 (192/259) | 69.5 (105/151)  | 80.6 (87/108)     |
| The same treatment is available outside of the trial but too expensive to access | 70.0 (182/260) | 68.4 (104/152)  | 72.2 (78/108)     |
| Access to free healthcare                                                        | 61.3 (160/261) | 60.5 (92/152)   | 62.4 (68/109)     |
| Apparent risks will outweigh the benefit                                         | 23.4 (60/256)  | 25.3 (38/150)   | 20.8 (22/106)     |
| No prospective self-benefit                                                      | 19.8 (51/257)  | 24.7 (37/150)   | 13.1 (14/107)     |
| Possibility to cure your disease                                                 | 91.6 (239/261) | 90.7 (137/151)  | 92.7 (102/110)    |

|                                                                                                                                                   |                |                |                |
|---------------------------------------------------------------------------------------------------------------------------------------------------|----------------|----------------|----------------|
| Possibility to prevent progression of your disease                                                                                                | 92.7 (240/259) | 92.0 (138/150) | 93.6 (102/109) |
| Possibility to treat some symptoms of your disease                                                                                                | 91.1 (235/258) | 91.3 (137/150) | 90.7 (98/108)  |
| Potential of worsening your disease                                                                                                               | 10.5 (27/257)  | 12.7 (19/150)  | 7.5 (8/107)    |
| Potential of experiencing transient major side effects                                                                                            | 10.6 (27/255)  | 12.7 (19/150)  | 7.6 (8/105)    |
| Potential of experiencing transient minor side effects                                                                                            | 34.0 (87/256)  | 33.8 (51/151)  | 34.3 (36/105)  |
| Potential for death from study participation                                                                                                      | 7.0 (18/257)   | 8.7 (13/150)   | 4.7 (5/107)    |
| Potential for closer monitoring of your health                                                                                                    | 67.7 (174/257) | 67.3 (101/150) | 68.2 (73/107)  |
| Potential out-of-pocket expenses                                                                                                                  | 13.3 (34/255)  | 12.9 (19/147)  | 13.9 (15/108)  |
| Desire to participate in any clinical trial                                                                                                       | 42.7 (109/255) | 46.3 (69/149)  | 37.7 (40/106)  |
| Desire to avoid participation in any clinical trial                                                                                               | 9.3 (23/247)   | 12.6 (18/143)  | 4.8 (5/104)    |
| <sup>1</sup> Nonrespondents on individual questions (maximum 34 [11.7%] for all, 26 [15.4%] for Adults and 17 [14.0%] for Children) are excluded. |                |                |                |

**ii. How likely would you/your child be to participate in a clinical trial if you learned about the trial through:**

|                                                                                                                                                   | All<br>N=290   | Adults<br>N=169 | Children<br>N=121 |
|---------------------------------------------------------------------------------------------------------------------------------------------------|----------------|-----------------|-------------------|
| Your primary care physician                                                                                                                       | 79.7 (208/261) | 81.6 (124/152)  | 77.1 (84/109)     |
| One of your medical specialists                                                                                                                   | 89.7 (234/261) | 90.8 (138/152)  | 88.1 (96/109)     |
| A healthy family member                                                                                                                           | 54.8 (143/261) | 58.6 (89/152)   | 49.5 (54/109)     |
| A family member that was already in the clinical trial                                                                                            | 66.9 (174/260) | 66.4 (101/152)  | 67.6 (73/108)     |
| A healthy friend                                                                                                                                  | 49.0 (128/261) | 53.3 (81/152)   | 43.1 (47/109)     |
| A friend who also has a mitochondrial disease                                                                                                     | 80.7 (209/259) | 82.9 (126/152)  | 77.6 (83/107)     |
| Another participant that was already in the clinical trial                                                                                        | 78.5 (204/260) | 78.3 (119/152)  | 78.7 (85/108)     |
| A support group or patient advocacy group                                                                                                         | 75.2 (194/258) | 75.3 (113/150)  | 75.0 (81/108)     |
| The NIH clinical trials website                                                                                                                   | 78.6 (202/257) | 81.9 (122/149)  | 74.1 (80/108)     |
| A newspaper article                                                                                                                               | 42.8 (110/257) | 43.3 (65/150)   | 42.1 (45/107)     |
| A social media website                                                                                                                            | 38.4 (99/258)  | 40.4 (61/151)   | 35.5 (38/107)     |
| The internet                                                                                                                                      | 42.5 (110/259) | 45.0 (68/151)   | 38.9 (42/108)     |
| The television                                                                                                                                    | 37.5 (97/259)  | 39.7 (60/151)   | 34.3 (37/108)     |
| A flyer                                                                                                                                           | 37.5 (96/256)  | 39.3 (59/150)   | 34.9 (37/106)     |
| A letter mailed to your home                                                                                                                      | 63.2 (163/258) | 64.9 (98/151)   | 60.7 (65/107)     |
| A phone call from the study team                                                                                                                  | 73.4 (190/259) | 75.7 (115/152)  | 70.1 (75/107)     |
| An email from the study team                                                                                                                      | 74.8 (193/258) | 75.7 (115/152)  | 73.6 (78/106)     |
| An email from the North American Mitochondrial Disease Consortium (NAMDC)                                                                         | 83.8 (217/259) | 83.6 (127/152)  | 84.1 (90/107)     |
| <sup>1</sup> Nonrespondents on individual questions (maximum 34 [11.7%] for all, 20 [11.8%] for Adults and 15 [16.5%] for Children) are excluded. |                |                 |                   |

**iii. How likely are you/your child to participate in a clinical trial knowing that:**

|                                                                      | All<br>N=290   | Adults<br>N=169 | Children<br>N=121 |
|----------------------------------------------------------------------|----------------|-----------------|-------------------|
| Your genetic information is being analyzed                           | 83.7 (200/239) | 84.1 (116/138)  | 83.2 (84/101)     |
| Your genetic information cannot affect your medical insurance policy | 84.8 (201/237) | 86.0 (117/136)  | 83.2 (84/101)     |

|                                                                                                                                       |                |               |               |
|---------------------------------------------------------------------------------------------------------------------------------------|----------------|---------------|---------------|
| Your genetic information can affect your ability to purchase a life insurance policy                                                  | 42.0 (100/238) | 44.5 (61/137) | 38.6 (39/101) |
| Your genetic information can affect your ability to qualify for disability insurance                                                  | 36.8 (88/239)  | 37.7 (51/138) | 36.6 (37/101) |
| †Nonrespondents on individual questions (maximum 53 [18.3%] for all, 33 [19.5%] for Adults and 20 [16.5%] for Children) are excluded. |                |               |               |

†Nonrespondents on individual symptoms (maximum n [33, 19.5%] for Adults and n [20, 16.5%] for Children) are excluded.
