# Supplementary material for: Mitochondrial disease patient motivations and barriers to participate in clinical trials
Source: PubMed Central journal article supplement (PMC5957366; doi:10.1371/journal.pone.0197513), 2018-05-17
Supplement: pone.0197513.s007.pdf [file pone.0197513.s007.pdf]

**S6 Table. Logistic Regression analysis of impact of past research experience<sup>1</sup> on preferences for study drug and design features among Adults and Children combined (N=290).**

| <b>Study drug or Study Design</b> | <b>Odds Ratio</b> | <b>95% CI</b> | <b>p-value</b> |
|-----------------------------------|-------------------|---------------|----------------|
| Drug had not been used before     | 1.17              | 0.73-1.88     | 0.52           |
| Injectable medication             | 0.84              | 0.50-1.41     | 0.50           |
| Stopping one medication           | 0.97              | 0.60-1.56     | 0.90           |
| Stopping all medications          | 0.99              | 0.62-1.57     | 0.96           |
| More than 1 year in length        | 1.24              | 0.72-2.17     | 0.44           |
| Daily blood tests                 | 0.78              | 0.48-1.27     | 0.32           |
| Placebo                           | 0.88              | 0.54-1.42     | 0.60           |
| Double blinded                    | 1.20              | 0.74-1.96     | 0.46           |
| Randomization                     | 0.99              | 0.61-1.61     | 0.97           |

<sup>1</sup> Respondents who had participated in a previous study or clinical trial were coded as having past research experience (N= 98).
