# Supplementary material for: Mitochondrial disease patient motivations and barriers to participate in clinical trials
Source: PubMed Central journal article supplement (PMC5957366; doi:10.1371/journal.pone.0197513), 2018-05-17
Supplement: pone.0197513.s008.pdf [file pone.0197513.s008.pdf]

**S7 Table. P-values from the Wilcoxon Rank-Sum Test (n=263) for Severity Score Measurement.**

| Method | Dichotomize Above/Below Median | Median Severity Score | Group Size           |                      | P-value |
|--------|--------------------------------|-----------------------|----------------------|----------------------|---------|
|        |                                |                       | Less severe symptoms | More severe symptoms |         |
| 1      | above                          | 5                     | 147                  | 116                  | 0.1379  |
| 1      | below                          | 5                     | 120                  | 143                  | 0.1579  |
