# Supplementary material for: Mitochondrial disease patient motivations and barriers to participate in clinical trials
Source: PLoS One. 2018 May 17;13(5):e0197513. doi: 10.1371/journal.pone.0197513 (PMC5957366; doi:10.1371/journal.pone.0197513)
Supplement: S2 Table — A. Symptoms Experienced by All patients, Adults and Children. 1Nonrespondents on individual symptoms (maximum for 16 [5.5%] Adults and 15 [5.2%] for Children) are excluded. Lower denominator (N) indicates the total number of respondents. B. All patients, Adults and Children likely to participate1 in a clinical trial, by symptom targeted. 1Respondents coded “likely to participate” responded “Would Participate” or “Likely to participate” in a trial aiming to treat the listed symptom. 2Nonrespondents on individual symptoms (maximum 27 [16.0%] for Adults and 14 [4.8%] for Children) are excluded. Lower denominator (N) indicates the total number of respondents. C. All patients, Adults and Children likely to participate1 in a clinical trial if experienced symptom is targeted. 1Respondents coded “likely to participate” responded “Would Participate” or “Likely to participate” in a trial aiming to treat the listed symptom. 2Nonrespondents on individual symptoms (maximum 258 [88.9%] for Adults and Children) are excluded. Lower denominator (N) indicates the total number of respondents. D. Symptoms most frequently selected by individuals in the top 31 that would prompt their participation in a clinical trial, among All patients, Adults and Children. 1Participants were asked to select, from a list of 35 symptoms, the top 3 that would prompt their participation in a clinical trial. 2Nonrespondents on individual symptoms (maximum 0 [0.0%] for Adults and 0 [0.0%] for Children) are excluded. Lower denominator (N) indicates the total number of respondents. (PDF) [file pone.0197513.s003.pdf]

**S2A Table. Symptoms Experienced by All patients, Adults and Children.**

| <b>All (N=290)<sup>1</sup></b> |                | <b>Adults (N=169)<sup>1</sup></b> |                | <b>Children (N=121)<sup>1</sup></b> |                |
|--------------------------------|----------------|-----------------------------------|----------------|-------------------------------------|----------------|
| <b>Symptom</b>                 | <b>% (n)</b>   | <b>Symptom</b>                    | <b>% (n)</b>   | <b>Symptom</b>                      | <b>% (n)</b>   |
| Muscle weakness                | 95.4 (270/283) | Chronic fatigue                   | 94.6 (156/165) | Muscle weakness                     | 98.3 (116/118) |
| Chronic fatigue                | 95.1 (269/283) | Muscle weakness                   | 93.3 (154/165) | Exercise intolerance                | 97.5 (115/118) |
| Exercise intolerance           | 94.7 (268/283) | Exercise intolerance              | 92.7 (153/165) | Chronic fatigue                     | 95.8 (113/118) |
| GI Problems                    | 79.6 (223/280) | Balance problems                  | 79.6 (129/162) | Gastrointestinal problems           | 87.2 (102/117) |
| Balance Problems               | 78.8 (219/278) | Gastrointestinal problems         | 74.2 (121/163) | Delayed milestones                  | 86.3 (101/117) |
| Sleep Problems                 | 68.7 (191/278) | Sleep problems                    | 72.0 (116/161) | Speech problems                     | 77.8 (91/117)  |
| Decreased Vision               | 64.7 (180/278) | Decreased vision                  | 72.0 (116/161) | Balance problems                    | 77.6 (90/116)  |
| Headache                       | 63.3 (176/278) | Headache                          | 65.4 (106/162) | Learning disability                 | 73.9 (85/115)  |
| Dehydration                    | 56.7 (157/277) | Peripheral neuropathy             | 58.9 (93/158)  | Dehydration                         | 68.7 (79/115)  |
| Peripheral Neuropathy          | 55.9 (151/270) | Eye muscle problems               | 57.9 (92/159)  | Intellectual disability             | 65.5 (76/115)  |
| Eye Muscle Problems            | 55.3 (151/273) | Ptosis                            | 56.6 (90/159)  | Sleep problems                      | 64.1 (75/117)  |
| Delayed milestones             | 55.2 (149/270) | Mood disorder                     | 50.9 (83/163)  | Headache                            | 60.3 (70/116)  |
| Speech Problems                | 55.0 (155/282) | Tinnitus                          | 50.0 (80/160)  | Behavioral problem                  | 57.9 (66/114)  |
| Mood Disorder                  | 51.1 (142/278) | Difficulty losing weight          | 49.4 (77/156)  | Dysautonomia                        | 57.5 (65/113)  |
| Ptosis                         | 50.9 (139/273) | Dehydration                       | 48.2 (78/162)  | Decreased vision                    | 54.7 (64/117)  |
| Dysautonomia                   | 48.1 (124/258) | Hyperlipidemia                    | 44.8 (73/163)  | Difficulty gaining weight           | 54.4 (62/114)  |
| Learning Disability            | 43.5 (120/276) | Heart rhythm problems             | 44.2 (72/163)  | Peripheral neuropathy               | 51.8 (58/112)  |
| Difficulty Gaining weight      | 40.6 (112/276) | Hearing loss                      | 41.7 (68/163)  | Eye muscle problems                 | 51.8 (59/114)  |
| Hearth Rhythm Problems         | 39.2 (109/278) | Dysautonomia                      | 40.7 (59/145)  | Mood disorder                       | 51.3 (59/115)  |
| Difficulty losing weight       | 38.9 (102/262) | Speech problems                   | 38.8 (64/165)  | Epilepsy                            | 45.8 (54/118)  |
| Intellectual Disability        | 38.7 (108/279) | Delayed milestones                | 31.4 (48/153)  | Ptosis                              | 43.0 (49/114)  |
| Sleep Apnea                    | 35.4 (97/274)  | Difficulty gaining weight         | 30.9 (50/162)  | Sleep apnea                         | 42.1 (48/114)  |
| Tinnitus                       | 34.3 (93/271)  | Sleep apnea                       | 30.6 (49/160)  | Autism spectrum behavior            | 39.1 (45/115)  |

|                          |               |                          |               |                          |               |
|--------------------------|---------------|--------------------------|---------------|--------------------------|---------------|
| Behavioral Problems      | 34.3 (95/277) | Optic nerve problems     | 28.5 (45/158) | Heart rhythm problems    | 32.2 (37/115) |
| Hearing Loss             | 33.5 (93/278) | Retinal problems         | 26.0 (41/158) | Optic nerve problems     | 23.7 (27/114) |
| Hyperlipidemia           | 33.3 (92/276) | Heart muscle problems    | 22.0 (35/159) | Difficulty losing weight | 23.6 (25/106) |
| Epilepsy                 | 31.2 (88/282) | Learning disability      | 21.7 (35/161) | Heart muscle problems    | 22.8 (26/114) |
| Optic Nerve Problems     | 26.5 (72/272) | Diabetes                 | 21.6 (35/162) | Hearing loss             | 21.7 (25/115) |
| Heart Muscle Problems    | 22.3 (61/273) | Epilepsy                 | 20.7 (34/164) | Hyperlipidemia           | 16.8 (19/113) |
| Autism Spectrum Disorder | 22.0 (60/273) | Intellectual disability  | 19.6 (32/163) | Retinal problems         | 15.8 (18/114) |
| Retinal Problems         | 21.7 (59/272) | Behavioral problem       | 17.8 (29/163) | Stroke                   | 13.0 (15)     |
| Diabetes                 | 14.7 (41/278) | Stroke                   | 12.4 (20/161) | Liver disease            | 12.8 (15/117) |
| Stroke                   | 12.7 (35/276) | Liver disease            | 11.7 (19/162) | Tinnitus                 | 11.7 (13/111) |
| Liver Disease            | 12.2 (34/279) | Kidney disease           | 10.6 (17/161) | Kidney disease           | 6.0 (7/116)   |
| Kidney Disease           | 8.7 (24/277)  | Autism spectrum behavior | 9.5 (15/158)  | Diabetes                 | 5.2 (6/116)   |

<sup>†</sup>Nonrespondents on individual symptoms (maximum for 16 [5.5%] Adults and 15 [5.2%] for Children) are excluded. Lower denominator (N) indicates the total number of respondents.

**S2B Table. All patients, Adults and Children likely to participate<sup>1</sup> in a clinical trial, by symptom targeted.**

| <b>All (N=290)<sup>2</sup></b>       |                | <b>Adults (N=169)<sup>2</sup></b>    |                | <b>Children (N=121)<sup>2</sup></b>  |                |
|--------------------------------------|----------------|--------------------------------------|----------------|--------------------------------------|----------------|
| <b>Symptom targeted by the trial</b> | <b>% (n)</b>   | <b>Symptom targeted by the trial</b> | <b>% (n)</b>   | <b>Symptom targeted by the trial</b> | <b>% (n)</b>   |
| Muscle weakness                      | 91.0 (244/268) | Chronic fatigue                      | 94.2 (146/155) | Muscle weakness                      | 88.6 (101/114) |
| Chronic fatigue                      | 87.7 (236/269) | Exercise intolerance                 | 94.2 (146/155) | Chronic fatigue                      | 79.0 (90/114)  |
| Exercise intolerance                 | 87.3 (234/268) | Muscle weakness                      | 92.9 (143/154) | Exercise intolerance                 | 77.9 (88/113)  |
| Gastrointestinal problems            | 73.0 (192/263) | Balance problems                     | 74.0 (111/150) | Gastrointestinal problems            | 75.9 (85/112)  |
| Balance problems                     | 72.9 (188/258) | Eye muscle problems                  | 71.4 (105/147) | Delayed milestones                   | 73.5 (83/113)  |
| Peripheral neuropathy                | 65.4 (166/254) | Peripheral neuropathy                | 71.0 (103/145) | Balance problems                     | 71.3 (77/108)  |
| Sleep problems                       | 64.8 (169/261) | Gastrointestinal problems            | 70.9 (107/151) | Learning disability                  | 71.2 (79/111)  |
| Eye muscle problems                  | 62.6 (161/257) | Decreased vision                     | 67.8 (101/149) | Intellectual disability              | 68.8 (75/109)  |
| Decreased vision                     | 60.7 (159/262) | Sleep problems                       | 66.9 (101/151) | Speech problems                      | 68.5 (76/111)  |
| Headache                             | 57.1 (149/261) | Ptosis                               | 63.8 (95/149)  | Sleep problems                       | 61.8 (68/110)  |
| Ptosis                               | 56.2 (146/260) | Headache                             | 58.0 (87/150)  | Dehydration                          | 60.7 (68/112)  |
| Dehydration                          | 56.1 (148/264) | Difficulty losing weight             | 56.1 (83/148)  | Dysautonomia                         | 58.9 (63/107)  |
| Speech problems                      | 53.7 (139/259) | Heart rhythm problems                | 54.1 (79/146)  | Peripheral neuropathy                | 57.8 (63/109)  |
| Dysautonomia                         | 52.0 (131/252) | Hyperlipidemia                       | 53.0 (79/149)  | Headache                             | 55.9 (62/111)  |
| Delayed milestones                   | 50.8 (131/258) | Dehydration                          | 52.6 (80/152)  | Behavioral problem                   | 52.3 (57/109)  |
| Learning disability                  | 50.4 (130/258) | Hearing loss                         | 52.4 (76/145)  | Mood disorder                        | 51.8 (57/110)  |
| Heart rhythm problems                | 50.0 (128/256) | Optic nerve problems                 | 51.4 (76/148)  | Decreased vision                     | 51.3 (58/113)  |
| Sleep apnea                          | 49.6 (129/260) | Retinal problems                     | 51.0 (73/143)  | Eye muscle problems                  | 50.9 (56/110)  |
| Intellectual disability              | 49.2 (126/256) | Heart muscle problems                | 50.7 (75/148)  | Sleep apnea                          | 50.9 (57/112)  |
| Mood disorder                        | 49.0 (127/259) | Sleep apnea                          | 48.7 (72/148)  | Epilepsy                             | 48.7 (54/111)  |
| Optic nerve problems                 | 48.5 (126/260) | Tinnitus                             | 48.6 (71/146)  | Difficulty gaining weight            | 48.7 (54/111)  |
| Heart muscle problems                | 46.9 (121/258) | Mood disorder                        | 47.0 (70/149)  | Autism spectrum behavior             | 46.4 (51/110)  |
| Difficulty losing weight             | 46.5 (120/258) | Dysautonomia                         | 46.9 (68/145)  | Ptosis                               | 46.0 (51/111)  |
| Hearing loss                         | 46.1 (118/256) | Diabetes                             | 45.1 (64/142)  | Optic nerve problems                 | 44.6 (50/112)  |

|                           |                |                           |               |                          |               |
|---------------------------|----------------|---------------------------|---------------|--------------------------|---------------|
| Retinal problems          | 45.5 (116/255) | Speech problems           | 42.6 (63/148) | Heart rhythm problems    | 44.6 (49/110) |
| Hyperlipidemia            | 45.4 (118/260) | Kidney disease            | 40.5 (60/148) | Heart muscle problems    | 41.8 (46/110) |
| Difficulty gaining weight | 41.0 (105/256) | Stroke                    | 38.1 (56/147) | Retinal problems         | 38.4 (43/112) |
| Behavioral problem        | 40.9 (105/257) | Liver disease             | 37.2 (55/148) | Hearing loss             | 37.8 (42/111) |
| Tinnitus                  | 40.5 (104/257) | Difficulty gaining weight | 35.2 (51/145) | Hyperlipidemia           | 35.1 (39/111) |
| Diabetes                  | 40.2 (101/251) | Intellectual disability   | 34.7 (51/147) | Stroke                   | 34.8 (39/112) |
| Epilepsy                  | 40.2 (104/259) | Learning disability       | 34.7 (51/147) | Diabetes                 | 33.9 (37/109) |
| Stroke                    | 36.7 (95/259)  | Epilepsy                  | 33.8 (50/148) | Difficulty losing weight | 33.6 (37/110) |
| Kidney disease            | 36.2 (93/257)  | Delayed milestones        | 33.1 (48/145) | Liver disease            | 31.8 (35/110) |
| Autism spectrum behavior  | 34.9 (89/255)  | Behavioral problem        | 32.4 (48/148) | Kidney disease           | 30.3 (33/109) |
| Liver disease             | 34.9 (90/258)  | Autism spectrum behavior  | 26.2 (38/145) | Tinnitus                 | 29.7 (33/111) |

<sup>1</sup> Respondents coded “likely to participate” responded “Would Participate” or “Likely to participate” in a trial aiming to treat the listed symptom.

<sup>2</sup> **Nonrespondents on individual symptoms (maximum 27 [16.0%] for Adults and 14 [4.8%] for Children) are excluded. Lower denominator (N) indicates the total number of respondents**

**S2C Table. All patients, Adults and Children likely to participate<sup>1</sup> in a clinical trial if experienced symptom is targeted.**

| <b>All (N=290)<sup>2</sup></b>                   |                | <b>Adults (N=169)<sup>2</sup></b>                |                | <b>Children (N=121)<sup>2</sup></b>              |                |
|--------------------------------------------------|----------------|--------------------------------------------------|----------------|--------------------------------------------------|----------------|
| <b>Experienced symptom targeted by the trial</b> | <b>% (n)</b>   | <b>Experienced symptom targeted by the trial</b> | <b>% (n)</b>   | <b>Experienced symptom targeted by the trial</b> | <b>% (n)</b>   |
| Muscle Weakness                                  | 93.0 (239/257) | Kidney Disease                                   | 100.0 (16/16)  | Diabetes                                         | 100.0 (4/4)    |
| Chronic Fatigue                                  | 90.3 (232/257) | Exercise Intolerance                             | 97.2 (140/144) | Muscle Weakness                                  | 89.3 (100/112) |
| Exercise Intolerance                             | 89.4 (227/254) | Chronic Fatigue                                  | 96.6 (143/148) | Intellectual Disability                          | 87.5 (63/72)   |
| Diabetes                                         | 86.5 (32/37)   | Muscle Weakness                                  | 95.9 (139/145) | Learning Disability                              | 86.6 (71/82)   |
| Kidney Disease                                   | 86.4 (19/22)   | Ptosis                                           | 89.4 (76/85)   | Stroke                                           | 85.7 (12/14)   |
| Intellectual Disability                          | 84.3 (86/102)  | Eye Muscle Problems                              | 88.6 (78/88)   | Optic Nerve Problems                             | 84.6 (22/26)   |
| Optic Nerve Problems                             | 84.3 (57/68)   | Peripheral Neuropathy                            | 88.4 (76/86)   | Dysautonomia                                     | 83.6 (51/61)   |
| Dysautonomia                                     | 83.8 (97/116)  | Gastrointestinal Problems                        | 85.8 (97/113)  | Gastrointestinal Problems                        | 82.5 (80/97)   |
| Peripheral Neuropathy                            | 83.6 (116/139) | Sleep Apnea                                      | 85.4 (41/48)   | Chronic Fatigue                                  | 81.7 (89/109)  |
| Balance Problems                                 | 83.5 (168/201) | Diabetes                                         | 84.8 (28/33)   | Delayed Milestones                               | 81.6 (80/98)   |
| Ptosis                                           | 82.0 (107/131) | Difficulty Losing Weight                         | 84.7 (61/72)   | Balance Problems                                 | 81.2 (69/85)   |
| Eye Muscle Problems                              | 81.7 (118/144) | Dysautonomia                                     | 83.6 (46/55)   | Autism Spectrum Behaviors                        | 81.0 (34/42)   |
| Learning Disability                              | 81.4 (94/116)  | Optic Nerve Problems                             | 83.3 (35/42)   | Speech Problem                                   | 80.5 (70/87)   |
| Hearing Loss                                     | 81.0 (68/84)   | Hearing Loss                                     | 82.5 (52/63)   | Exercise Intolerance                             | 79.1 (87/110)  |
| Sleep Apnea                                      | 81.0 (74/91)   | Balance Problems                                 | 82.5 (99/120)  | Sleep Difficulties                               | 78.6 (55/70)   |
| Stroke                                           | 79.6 (27/34)   | Decreased Vision                                 | 82.1 (87/106)  | Hearing Loss                                     | 76.2 (16/21)   |
| Difficulty Losing Weight                         | 79.4 (76/96)   | Heart Rhythm Problems                            | 80.6 (54/65)   | Heart Rhythm Problems                            | 75.8 (25/33)   |
| Sleep Difficulties                               | 79.2 (140/177) | Sleep Difficulties                               | 79.4 (85/107)  | Peripheral Neuropathy                            | 75.5 (40/53)   |
| Heart Rhythm Problems                            | 79.1 (79/100)  | Retinal Problems                                 | 78.4 (29/37)   | Epilepsy                                         | 74.0 (37/50)   |
| Gastrointestinal Problems                        | 79.0 (117/148) | Intellectual Disability                          | 76.7 (23/30)   | Sleep Apnea                                      | 73.3 (33/45)   |
| Decreased Vision                                 | 76.5 (127/166) | Heart Muscle Problems                            | 75.8 (25/33)   | Headache                                         | 72.7 (48/66)   |

|                           |                |                           |              |                           |              |
|---------------------------|----------------|---------------------------|--------------|---------------------------|--------------|
| Autism Spectrum Behaviors | 76.4 (42/55)   | Dehydration               | 75.7 (56/74) | Retinal Problems          | 72.2 (13/18) |
| Retinal Problems          | 76.4 (42/55)   | Stroke                    | 75.0 (15/20) | Difficulty Gaining Weight | 72.1 (44/61) |
| Speech Problem            | 76.4 (113/148) | Headache                  | 74.7 (74/99) | Dehydration               | 71.4 (55/77) |
| Delayed Milestones        | 76.1 (108/142) | Hyperlipidemia            | 74.3 (52/70) | Heart Muscle Problems     | 70.8 (17/24) |
| Headache                  | 73.9 (122/165) | Tinnitus                  | 71.6 (53/74) | Eye Muscle Problems       | 70.2 (40/57) |
| Heart Muscle Problems     | 73.7 (42/57)   | Speech Problem            | 70.5 (43/61) | Liver Disease             | 69.2 (9/13)  |
| Dehydration               | 73.5 (111/151) | Behavioral Problems       | 70.4 (19/27) | Behavioral Problems       | 68.8 (44/64) |
| Hyperlipidemia            | 72.4 (63/87)   | Epilepsy                  | 69.7 (23/33) | Ptosis                    | 67.4 (31/46) |
| Epilepsy                  | 72.3 (60/83)   | Learning Disability       | 67.6 (23/34) | Decreased Vision          | 66.7 (40/60) |
| Tinnitus                  | 69.8 (60/86)   | Mood Disorder             | 67.5 (54/80) | Mood Disorder             | 64.9 (37/57) |
| Behavioral Problems       | 69.2 (63/91)   | Delayed Milestones        | 63.6 (28/44) | Hyperlipidemia            | 64.7 (11/17) |
| Difficulty Gaining Weight | 66.7 (72/108)  | Liver Disease             | 63.2 (12/19) | Difficulty Losing Weight  | 62.5 (15/24) |
| Mood Disorder             | 66.4 (91/137)  | Autism Spectrum Behaviors | 61.5 (8/13)  | Tinnitus                  | 58.3 (7/12)  |
| Liver Disease             | 65.6 (21/32)   | Difficulty Gaining Weight | 59.6 (28/47) | Kidney Disease            | 50.0 (3/6)   |

Respondents coded “likely to participate” responded “Would Participate” or “Likely to participate” in a trial aiming to treat the listed symptom.

<sup>2</sup> Nonrespondents on individual symptoms (maximum 258 [88.9%] for Adults and Children) are excluded. Lower denominator (N) indicates the total number of respondents.

**S2D Table. Symptoms most frequently selected by individuals in the top 3<sup>1</sup> that would prompt their participation in a clinical trial, among All patients, Adults and Children.**

| <b>All (N=290)<sup>2</sup></b> |                | <b>Adults (N=169)<sup>2</sup></b> |               | <b>Children (N=121)<sup>2</sup></b> |               |
|--------------------------------|----------------|-----------------------------------|---------------|-------------------------------------|---------------|
| <b>Symptom</b>                 | <b>% (n)</b>   | <b>Symptom</b>                    | <b>% (n)</b>  | <b>Symptom</b>                      | <b>% (n)</b>  |
| Muscle weakness                | 43.1 (125/290) | Chronic fatigue                   | 52.7 (89/169) | Muscle weakness                     | 40.5 (49/121) |
| Chronic fatigue                | 41.4 (120/290) | Muscle weakness                   | 45.0 (76/169) | Chronic fatigue                     | 25.6 (31/121) |
| Exercise intolerance           | 23.8 (69/290)  | Exercise intolerance              | 32.5 (55/169) | Gastrointestinal problems           | 24.0 (29/121) |
| Dysautonomia                   | 17.9 (62/290)  | Eye muscle problems               | 17.8 (30/169) | Dysautonomia                        | 23.1 (28/121) |
| Gastrointestinal problems      | 17.9 (52/290)  | Dysautonomia                      | 14.2 (24/169) | Epilepsy                            | 19.0 (23/121) |
| Epilepsy                       | 10.7 (31/290)  | Ptosis                            | 14.2 (24/169) | Speech problems                     | 12.4 (15/121) |
| Eye muscle problems            | 10.7 (31/290)  | Gastrointestinal problems         | 13.6 (23/169) | Exercise intolerance                | 11.6 (14/121) |
| Ptosis                         | 8.6 (25/290)   | Peripheral neuropathy             | 10.7 (18/169) | Intellectual disability             | 10.7 (13/121) |
| Peripheral neuropathy          | 7.2 (21/290)   | Decreased vision                  | 8.3 (14/169)  | Autism spectrum behavior            | 9.9 (12/121)  |
| Imbalance                      | 6.9 (20/290)   | Headache                          | 8.3 (14/169)  | Learning disability                 | 9.9 (12/121)  |
| Decreased vision               | 6.2 (18/290)   | Imbalance                         | 7.7 (13/169)  | Behavioral problem                  | 9.1 (11/121)  |
| Speech problem                 | 6.2 (18/290)   | Difficulty losing weight          | 4.7 (8/169)   | Delayed milestones                  | 8.3 (10/121)  |
| Headache                       | 5.5 (16/290)   | Epilepsy                          | 4.7 (8/169)   | Difficulty gaining weight           | 8.3 (10/121)  |
| Sleep problems                 | 5.2 (15/290)   | Sleep problems                    | 4.1 (7/169)   | Sleep problems                      | 6.6 (8/121)   |
| Intellectual disability        | 5.2 (15/290)   | Retinal problems                  | 4.1 (7/169)   | Balance problems                    | 5.8 (7/121)   |
| Difficulty gaining weight      | 4.5 (13/290)   | Heart rhythm problems             | 3.6 (6/169)   | Heart rhythm problems               | 4.1 (5/121)   |
| Autism spectrum behavior       | 4.1 (12/290)   | Optic nerve problems              | 3.6 (6/169)   | Liver disease                       | 4.1 (5/121)   |
| Learning disability            | 4.1 (12/290)   | Dehydration                       | 3.0 (5/169)   | Mood disorder                       | 4.1 (5/121)   |
| Retinal problems               | 4.1 (12/290)   | Diabetes                          | 3.0 (5/169)   | Retinal problems                    | 4.1 (5/121)   |
| Behavioral problem             | 3.8 (11/290)   | Heart muscle problems             | 3.0 (5/169)   | Decreased vision                    | 3.3 (4/121)   |
| Heart rhythm problems          | 3.4 (11/290)   | Hearing loss                      | 2.4 (4/169)   | Hearing loss                        | 3.3 (4/121)   |
| Delayed milestones             | 3.4 (10/290)   | Stroke                            | 2.4 (4/169)   | Heart muscle problems               | 3.3 (4/121)   |
| Difficulty losing weight       | 3.4 (10/290)   | Difficulty gaining weight         | 1.8 (3/169)   | Optic nerve problems                | 3.3 (4/121)   |
| Optic nerve problems           | 3.4 (10/290)   | Speech problems                   | 1.8 (3/169)   | Sleep apnea                         | 3.3 (4/121)   |

|                       |             |                          |             |                          |              |
|-----------------------|-------------|--------------------------|-------------|--------------------------|--------------|
| Heart muscle problems | 3.1 (9/290) | Tinnitus                 | 1.8 (3/169) | Peripheral neuropathy    | 2.5 (3/121)  |
| Hearing loss          | 2.8 (8/290) | Intellectual disability  | 1.2 (2/169) | Dehydration              | 1.7 (2/121)  |
| Dehydration           | 2.4 (7/290) | Mood disorder            | 1.2 (2/169) | Difficulty losing weight | 1.7 (2/121)  |
| Mood disorder         | 2.4 (7/290) | Hyperlipidemia           | 0.6 (1/169) | Headache                 | 1.7 (2/121)  |
| Diabetes              | 2.1 (6/290) | Liver disease            | 0.6 (1/169) | Stroke                   | 1.7 (2/121)  |
| Liver disease         | 2.1 (6/290) | Sleep apnea              | 0.6 (1/169) | Diabetes                 | 0.8 (1/121)  |
| Stroke                | 2.1 (6/290) | Autism spectrum behavior | 0.0 (0/169) | Eye muscle problems      | 0.8 (1/121)  |
| Sleep apnea           | 1.7 (5/290) | Behavioral problem       | 0.0 (0/169) | Hyperlipidemia           | 0.8 (1/121)  |
| Tinnitus              | 1.0 (3/290) | Delayed milestones       | 0.0 (0/169) | Kidney disease           | 0.8 (1/121)  |
| Hyperlipidemia        | 0.7 (2/290) | Kidney disease           | 0.0 (0/169) | Ptosis                   | 0.8 (1/121)  |
| Kidney disease        | 0.3 (1/290) | Learning disability      | 0.0 (0/169) | Tinnitus                 | 0. (0.0/121) |

<sup>1</sup>Participants were asked to select, from a list of 35 symptoms, the top 3 that would prompt their participation in a clinical trial.

<sup>2</sup> Nonrespondents on individual symptoms (maximum 0 [0.0%] for Adults and 0 [0.0%] for Children) are excluded. Lower denominator (N) indicates the total number of respondents.
